1 **Disruption of Smarce1, a component of the SWI/SNF chromatin remodeling complex,**  
2 **decreases nucleosome stability in mouse embryonic stem cells and impairs**  
3 **differentiation**

4  
5 Katsunobu Kashiwagi<sup>1,3</sup> Junko Yoshida<sup>1</sup>, Hiroshi Kimura<sup>2</sup>, and Kyoji Horie<sup>1\*</sup>

6  
7 <sup>1</sup>Department of Physiology II, Nara Medical University, Kashihara, Nara 634-8521, Japan

8 <sup>2</sup>Cell Biology Center, Institute of Innovative Research, Tokyo Institute of Technology,  
9 Yokohama, Kanagawa 226-8503, Japan

10 <sup>3</sup>Present address: Division of Cancer Biology, Nagoya University Graduate School of  
11 Medicine, 65 Tsurumai-cho, Showa-ku, Nagoya, Aichi 466-8550, Japan

12  
13 \*Correspondence and requests for materials should be addressed to K.H. (email: k-  
14 horie@naramed-u.ac.jp)

15  
16 Running title: Disruption of Smarce1 decreases nucleosome stability

17  
18  
19 **Abstract**

20  
21 The SWI/SNF chromatin remodeling complex consists of more than 10 component proteins  
22 that form a large protein complex of > 1 MDa. The catalytic proteins Smarca4 or Smarca2  
23 work in concert with the component proteins to form a chromatin platform suitable for  
24 transcriptional regulation. However, the mechanism by which each component protein works  
25 synergistically with the catalytic proteins remains largely unknown. Here, we report on the

26 function of Smarce1, a component of the SWI/SNF complex, through the phenotypic analysis  
27 of homozygous mutant embryonic stem (ES) cells. Disruption of Smarce1 induced the  
28 dissociation of other complex components from the SWI/SNF complex. Histone binding to  
29 DNA was loosened in homozygous mutant ES cells, indicating that disruption of Smarce1  
30 decreased nucleosome stability. Sucrose gradient sedimentation analysis suggested an ectopic  
31 genomic distribution of the SWI/SNF complex, accounting for the misregulation of  
32 chromatin conformations. Unstable nucleosomes remained during ES cell differentiation,  
33 impairing the heterochromatin formation that is characteristic of the differentiation process.  
34 These results suggest that Smarce1 guides the SWI/SNF complex to the appropriate genomic  
35 regions to generate chromatin structures adequate for transcriptional regulation.

36

37

## 38 **Introduction**

39

40 Eukaryotic DNA wraps around histone octamers, each of which contains two copies of  
41 Histone H2A, H2B, H3, and H4, to form the nucleosome, a functional unit of chromatin  
42 structure [1]. Chromatin is composed of chains of nucleosomes and is packed at various  
43 densities related to the transcriptional activity in each region [2]. Active chromatin regions  
44 are loosely packed in the nucleus, whereas repressed chromatin regions are tightly packed [3-  
45 5]. The formation of chromatin is a benefit for functional storage of nuclear DNA, but it also  
46 interferes with the binding of transcription factors to DNA [1, 2]. To overcome this physical  
47 interference, eukaryotic cells utilize the energy of ATP hydrolysis to move histones to make  
48 chromatin structures suitable for transcriptional regulation [6-8]. These functional changes in  
49 chromatin structure are called chromatin remodeling, and these processes are mediated by  
50 ATP-dependent chromatin remodeling factor complexes. These complexes have subunits

51 containing a conserved catalytic ATPase domain and are divided into four subfamilies:  
52 imitation switch (ISWI), switch/sucrose non-fermentable (SWI/SNF), chromatin helicase  
53 DNA binding (CHD), and INO80 or SWR1. All these remodeling complexes commonly  
54 change the positions of nucleosomes, but each chromatin remodeling complex also has  
55 characteristic functions. ISWI and CHD chromatin remodeling complexes assemble histone  
56 octamers and form evenly spaced nucleosomes [9-12]. INO80 subfamily remodelers replace  
57 histone H2A-H2B dimer with H2A.Z-H2B dimer [13]. SWI/SNF slides or evicts histones to  
58 make a suitable platform for transcriptional regulation [14]. Brm, a catalytic ATPase domain-  
59 containing protein of *Drosophila* SWI/SNF, was originally discovered as a suppressor of  
60 Polycomb group protein. Therefore, SWI/SNF is recognized in a broad sense as a Trithorax  
61 protein [15].

62 SWI/SNF chromatin remodeling complexes are composed of more than 10 subunits that  
63 form large, species-specific complexes of >1 MDa [16]. Mammalian SWI/SNF chromatin  
64 remodeling complexes are related to yeast SWI/SNF and RSC chromatin remodeling  
65 complexes in terms of subunit composition. Mammalian SWI/SNF chromatin remodeling  
66 complexes are also called BAF, Brg1/Brahma-associated factor complexes [17, 18]. Distinct  
67 subfamilies of BAF complexes have been reported in mouse cells and are required to  
68 maintain the pluripotent state of undifferentiated cells and their proper differentiation [19-22].  
69 The components of the mouse BAF complexes change during differentiation. The ES cell-  
70 specific BAF complex (esBAF) is mainly composed of Smarca4 (Brg1), Arid1a, Smarcb1, a  
71 homo-dimer of Smarcc1, Smarcd1/2, Smarce1, Phf10/Dpf2, and actin-like protein 6a [19, 20].  
72 Differentiation of ES cells into post-mitotic neurons accompanies the replacement of the  
73 components of esBAF complex: Arid1a by a hetero-dimer of Arid1a and Arid1b, the homo-  
74 dimer of Smarcc1 by a hetero-dimer of Smarcc1 and Smarcc2, Phf10/Dpf2 by Dpf1/Dpf3,  
75 and Smarcd1/2 by Smarcd1/3. The mutually exclusive catalytic subunits, Smarca4 and

76 Smarca2, are also exchanged during differentiation. The post-mitotic neuron-specific BAF  
77 complex is called neuronal BAF (nBAF) [23-26]. BAF complexes are recognized as both a  
78 tumor suppressor and oncogene and are the most frequently (~20%) mutated chromatin  
79 regulatory proteins in human cancers [27]. Somatic mutations in human SMARCB1 have  
80 been identified in rhabdoid tumor, and loss of SMARCB1 from the canonical BAF complex  
81 results in the formation of rhabdoid tumor-specific BAF complex [28]. SMARCE1, thought  
82 to be a core component of the BAF complex and is present in all known canonical  
83 subfamilies of the BAF complex, is also mutated in meningioma [29-31], and genetic  
84 mutation of SMARCE1 causes Coffin–Siris syndrome [32], a multiple congenital anomaly  
85 syndrome. A previous study in *Drosophila* showed that heterozygosity of BAP111, an  
86 ortholog of mammalian Smarce1, enhanced the phenotype resulting from partial loss of Brm,  
87 a *Drosophila* homolog of mammalian Smarca2. This indicated that there is a genetic  
88 interaction between BAP111 and Brm [33]. Mouse Smarce1 has an HMG domain in its N-  
89 terminal domain, which is predicted to direct the BAF complex to bind to appropriate  
90 genomic regions [18]. However, it is largely unknown how Smarce1 affects the localization  
91 of the BAF complex within the genome, the integrity of the BAF complex, maintenance of a  
92 pluripotent state, or differentiation of ES cells.

93 In the present study, we conducted biochemical and cell biological analyses of Smarce1  
94 using homozygous mutant mouse ES cells. We previously developed a method to rapidly  
95 generate homozygous mutant mouse ES cell lines and constructed a homozygous mutant ES  
96 cell bank consisting of about 200 mutant cell lines [34]. During the phenotypic screening of  
97 the homozygous mutant ES cells, we noticed that mutant ES cells of Smarce1, a component  
98 of the BAF complex, exhibit abnormal morphology. We observed an ectopic genomic  
99 distribution of mutant cell-specific BAF complex and the induction of instability in  
100 nucleosomes. Mutant cells were also impaired in proliferation and showed abnormal



101 differentiation, accompanied by a deficit of heterochromatinization. These results suggest  
102 that Smarce1 is required to maintain the integrity the BAF complex and guides the BAF  
103 complex to the appropriate genomic regions to form a proper chromatin structure for  
104 transcriptional regulation.

105

106

## 107 **Results**

108

### 109 **Smarce1 knockout locally induces H3K9-acetylation in mouse ES cells**

110 The structures of the *Smarce1* alleles of wild-type (*WT*), homozygous mutant (*Smarce1<sup>m/m</sup>*),  
111 and revertant (*Smarce1<sup>r/r</sup>*) ES cells used in this study are shown in Figure 1A. *Smarce1<sup>r/r</sup>* ES  
112 cells were obtained by removing the *FRT*-flanked gene trap unit using Flp recombinase as  
113 reported previously [34] and were used as a control for the Smarce1 knockout phenotype.  
114 Disruption and reversion of Smarce1 were confirmed by Western blot analysis (Fig. 1B).

115 *WT* ES cells formed round, dome-shaped colonies (Fig. 1C), which is a characteristic  
116 feature of undifferentiated mouse ES cells. In contrast, *Smarce1<sup>m/m</sup>* ES cells exhibited flat,  
117 irregular shaped colonies (Fig. 1C). *Smarce1<sup>r/r</sup>* ES cells formed round, dome-shaped colonies  
118 similar to *WT* ES cells (Fig. 1C), indicating that excision of the gene trap unit reverted the ES  
119 cell phenotype. We examined the expression level of pluripotency genes *Oct3/4* and *Nanog*.  
120 Although the morphology of *Smarce1<sup>m/m</sup>* ES cells was different from typical undifferentiated  
121 ES cells, expression of *Oct3/4* was maintained, and expression of *Nanog* was slightly  
122 increased (Fig. 1D). This observation may indicate that the chromatin structure at the  
123 pluripotency gene locus is more open in *Smarce1<sup>m/m</sup>* ES cells compared to *WT* cells. To  
124 address this possibility, we analyzed the histone modification status of the transcriptional  
125 regulatory regions of *Oct3/4*, *Nanog*, and *Sox2* by chromatin immunoprecipitation followed

126 by real-time PCR (ChIP-qPCR) (Fig. 1E–G). As expected, acetylation of lysine 9 on histone  
127 H3 (H3K9ac), a marker for open chromatin [35], was increased in the transcriptional  
128 regulatory regions of *Oct3/4*, *Nanog*, and *Sox2* (Fig. 1E–G). However, there was no  
129 significant difference in lysine 9 trimethylation of histone H3 (H3K9me3), which is a marker  
130 for heterochromatin [36] (Fig. 1E–G). To investigate whether the alteration of histone  
131 modification is a local event or is present genome-wide, we analyzed the retroelements  
132 *LINE1* and *IAP* (Fig. 1H–K). *LINE1* and *IAP* are repetitive elements present in the genome at  
133 a high copy number and are known to be regulated by histone modifications [37–39]. The  
134 levels of H3K9ac and H3K9me3 in the *LINE1* and *IAP* regions were almost the same in *WT*,  
135 *Smarce1<sup>m/m</sup>*, and *Smarce1<sup>r/r</sup>* (Fig. 1H–K) except for a slight difference in *IAP U3* (less than  
136 1.3-fold; Fig. 1K), indicating that the alteration of histone modification observed in  
137 *Smarce1<sup>m/m</sup>* is present in restricted regions of the genome. Taken together, these data suggest  
138 that *Smarce1* knockout induces an open chromatin structure in a local region such as  
139 pluripotency genes.

140

### 141 **Smarce1 knockout loosens the binding of histone H3 to DNA**

142 Smarce1 contains an HMG domain, which shares homology with the yeast NHP6A  
143 protein [18, 40] (Supplementary Fig. 1). Although yeast NHP6A is not a component of the  
144 chromatin remodeling complex, physical and genetic interactions of NHP6A with RSC  
145 chromatin remodeling complex have been reported [41]. In addition, NHP6A mutant yeasts  
146 have been reported to have loose histone-chromatin binding [42, 43]. These observations  
147 suggest the histone-chromatin binding may also be loose in *Smarce1<sup>m/m</sup>* ES cells. To address  
148 this possibility, we conducted a biochemical salt extraction assay to examine the binding  
149 strength of histones to DNA. Buffers containing different concentrations of salt were added  
150 to a nuclear solution of *WT*, *Smarce1<sup>m/m</sup>*, and *Smarce1<sup>r/r</sup>* ES cells to make the final salt

151 concentration 75–450 mM (Fig. 2A). Histone H3 was extracted from these nuclei without  
152 cutting the genomic DNA. From the *WT* and *Smarce1<sup>r/r</sup>* nuclei, only a small amount of  
153 histone H3 was extracted even at the highest salt concentration (450 mM) (Fig. 2B),  
154 indicating a tight association of histone H3 with DNA. In contrast, from *Smarce1<sup>m/m</sup>* nuclei,  
155 extraction of histone H3 was increased at moderate salt concentrations (300 mM), and  
156 histone H3 was readily extracted at the highest salt concentration (450 mM) (Fig. 2B),  
157 indicating a loose association of histone H3 to DNA in *Smarce1<sup>m/m</sup>* nuclei. In accordance  
158 with this observation, Arid1a, one of the components of the BAF complex, was also readily  
159 extracted from *Smarce1<sup>m/m</sup>* nuclei (Fig. 2B). Extraction of the transcriptional repressor  
160 protein Kap1 was also higher in *Smarce1<sup>m/m</sup>* ES cells compared to *WT* and *Smarce1<sup>r/r</sup>* ES  
161 cells at the highest salt concentration (450 mM) (Fig. 2B). Unexpectedly, the amount of Kap1  
162 extracted from the nuclei decreased with increasing salt concentration in the extraction buffer  
163 (Fig. 2B). Kap1 or a complex containing Kap1 acquired hydrophobicity under high salt  
164 concentration and may have been lost from the soluble fraction due to salt precipitation (Fig.  
165 2B). In contrast to these proteins, extraction efficiencies of Smarcc1 and Smarcc2 that were  
166 highly and lowly expressed in *WT* ES cells, respectively, did not change between *WT*,  
167 *Smarce1<sup>m/m</sup>* and *Smarce1<sup>r/r</sup>* ES cells (Fig. 2B). These results of the loose association of  
168 chromatin proteins with DNA indicate that *Smarce1<sup>m/m</sup>* ES cells have unstable nucleosomes.

169 We then analyzed global chromatin architecture by micrococcal nuclease (MNase)  
170 sensitivity assay (Fig. 2C). When nuclei isolation and MNase treatment were carried out in  
171 the presence of 75 mM salt, in which higher-order chromatin structure is maintained [44, 45],  
172 no difference in global digestion pattern of chromatin was observed between *WT*, *Smarce1<sup>m/m</sup>*,  
173 and *Smarce1<sup>r/r</sup>* cells (Fig. 2D). This result was consistent with the findings of the salt  
174 extraction assay in which histone H3 was tightly associated with chromatin in *Smarce1<sup>m/m</sup>*  
175 nuclei in low salt (75 mM) concentration as in *WT* and *Smarce1<sup>r/r</sup>* (Fig. 2B). Taken together,

176 these results indicate that the genome-wide nucleosome positioning is unaffected in  
177 *Smarce1<sup>m/m</sup>* ES cells despite weak interactions between histones and DNA.  
178  
179 **The interaction between Smarca4 and the components of the BAF complex is reduced in**  
180 **Smarce1 mutant ES cells**  
181 Recent studies have shown that a mutation of *SMARCB1* reduced the amount of ARID1A/B  
182 and DPF2 in BAF chromatin remodeling complex [46, 47]. These studies suggest that a  
183 mutation in one component of BAF chromatin remodeling complex may alter the amount of  
184 other components. To explore the possibility that a mutation of *Smarce1* induces changes in  
185 the components of esBAF chromatin remodeling complex (Supplementary Fig. 2), we  
186 analyzed Smarca4-interacting proteins by immunoprecipitation analysis. Nuclear extracts  
187 were prepared from MNase-treated *WT*, *Smarce1<sup>m/m</sup>*, and *Smarce1<sup>r/r</sup>* cells in the presence of  
188 150 mM salt and were immunoprecipitated with anti-Smarca4 antibody at the same salt  
189 concentration (Fig. 3). As a control, a normal rabbit IgG was used for a mock  
190 immunoprecipitation. Smarca4-interacting proteins were further investigated by immunoblot  
191 analysis. Consistent with the results of the salt extraction assay (Fig. 2B), Arid1a and Kap1  
192 were readily extracted from *Smarce1<sup>m/m</sup>* as shown in the input lane (Fig. 3). The amount of  
193 Arid1a precipitated with the anti-Smarca4 antibody decreased in *Smarce1<sup>m/m</sup>* (Fig. 3),  
194 suggesting a reduction of Arid1a in the BAF complex. Smarca4 successfully pulled down  
195 Arid3b, which has not been reported as a component of the BAF complex, even though no  
196 protein was detected in the input lane due to limited detection sensitivity. Brd9, a  
197 bromodomain-containing protein, has been reported to interact with Smarca4 but not with  
198 Smarce1 and to be contained in a non-canonical BAF complex called GBAF complex [26, 47,  
199 48] (Supplementary Fig. 2). Therefore, we investigated the interaction between Smarca4 and  
200 Brd9 in *WT*, *Smarce1<sup>m/m</sup>*, and *Smarce1<sup>r/r</sup>* but did not observe any differences between the

201 three cell lines. These results indicate that a Smarce1 deficiency affects the components of  
202 the esBAF complex but not the composition of the non-canonical GBAF complex. Smarca4  
203 has also been reported to interact with repressor proteins such as PRC2 protein Ezh2, Kap1  
204 [49] and HDAC1 [50]. Weak interactions of Ezh2 and HDAC1 with Smarca4 were detected  
205 in *WT*, *Smarce1<sup>m/m</sup>*, and *Smarce1<sup>r/r</sup>*. However, no interaction was detected between Kap1 and  
206 Smarca4 in the three cell lines.

207 Taken together, the interaction of Smarca4 with Arid1a, a component of the esBAF  
208 complex, was decreased in *Smarce1<sup>m/m</sup>* cells. However, the interaction of Smarca4 with  
209 components of the GBAF complex, Arid3b, Ezh2, and HDAC1 was unaffected in  
210 *Smarce1<sup>m/m</sup>* cells. These results suggest that a deficiency of Smarce1 specifically affects the  
211 components of the esBAF complex but not GBAF or the repressor complexes.

212

### 213 **Characterization of the protein composition and genomic distribution of the BAF** 214 **complex by sucrose gradient sedimentation analysis**

215 To further analyze the properties of the BAF complex in *Smarce1<sup>m/m</sup>* cells, soluble chromatin  
216 from MNase-treated *WT* and *Smarce1<sup>m/m</sup>* cells was subjected to 10–40% (W/V) sucrose  
217 gradient sedimentation analysis. Fractionated BAF component proteins and other chromatin-  
218 associated proteins prepared from *Smarce1<sup>m/m</sup>* cells were compared to those of *WT* cells. We  
219 performed experiments with two different salt concentrations: 75 mM and 300 mM. Under 75  
220 mM salt, chromatin is expected to maintain a high-order structure [44, 45]; therefore,  
221 interactions between various proteins and chromatin will be detected. Under 300 mM salt,  
222 many proteins are expected to dissociate from chromatin.

223 Under the low salt concentration (75 mM), Smarca4 from *Smarce1<sup>m/m</sup>* cells migrated  
224 towards both the top and bottom fractions compared to *WT* cells (Fig. 4A). Other components  
225 of the BAF complex, Arid1a, Smarcc1, and Smarcc2, from *Smarce1<sup>m/m</sup>* cells also migrated

226 towards both the top and bottom fractions (Fig. 4A). The molecular weight of Smarce1 is  
227 46.64 kD. Given the distribution of gel filtration molecular markers centrifuged in parallel  
228 (Fig. 4A, top), migration of the BAF complex components to the top fractions cannot be  
229 explained by the lack of Smarce1 alone. Arid1a protein was detected in fractions 4 and 6 in  
230 *Smarce1<sup>m/m</sup>*, but not in *WT* (Fig. 4A). From the distribution of the molecular markers, the  
231 molecular weight of proteins in fraction 6 would be about 230 kD. Because the molecular  
232 weight of Arid1a is 242.05 kD, the Arid1a protein detected in fraction 6 may represent a free  
233 protein dissociated from the BAF complex. This observation was consistent with the  
234 immunoprecipitation assay (Fig. 3), which suggested that BAF components such as Arid1a  
235 dissociated from the complex in *Smarce1<sup>m/m</sup>* ES cells. However, migration to the bottom  
236 fractions contradicted the size reduction of the BAF complex. Smarce1 has an HMGB1  
237 domain that has DNA-binding activity [18]. Therefore, when Smarce1 is disrupted, the BAF  
238 complex may incorrectly interact with chromatin. Migration of the BAF complex to the  
239 bottom fractions suggests the interaction of the BAF complex with heterochromatin regions.  
240 This unexpected migration of the BAF complex towards the bottom fractions was  
241 accompanied by migration of the PRC2 components Ezh2 and Suz12 to the top fractions (Fig.  
242 4A). Misregulation of Smarca4 localization may have exerted chromatin remodeling  
243 ectopically in heterochromatin regions, disrupted the chromatin platform suitable for PRC2  
244 binding, and shifted PRC2 components Ezh2 and Suz12 towards the top fractions. In contrast,  
245 Brd9, Arid3b, and other repressor proteins such as HDAC1 and Kap1 did not shift to the  
246 bottom or top fractions (Fig. 4A). This observation was consistent with the results of the  
247 immunoprecipitation assay showing that the effects of the Smarce1 deficiency were limited  
248 to components of the esBAF complex (Fig. 3).

249         Next, we performed the sucrose gradient sedimentation assay at the high salt  
250 concentration (300 mM) for which no interaction between Smarca4 and histone H3 was

251 observed (Supplementary Fig. 3). At this concentration, Smarca4 from *Smarca1<sup>m/m</sup>* cells  
252 migrated towards the top fractions, but not to the bottom fractions in contrast to the low salt  
253 concentration (Fig. 4B). Other components of the BAF complex, Arid1a, Arid1b, Smarcc1,  
254 and Smarcc2 prepared from *Smarca1<sup>m/m</sup>* cells, also co-migrated towards the top fractions only.  
255 This observation supports the above-mentioned notion that the migration of the BAF  
256 complex components to the bottom fractions under low salt concentration reflects the  
257 interaction of the BAF complex with heterochromatin regions. In contrast to esBAF complex  
258 component proteins, non-esBAF complex proteins such as Arid3b, Brd9, and repressor  
259 proteins were not affected (Fig. 4B), indicating the specificity of the effect of *Smarca1*-  
260 knockout on the esBAF complex.

261

### 262 **Abnormal differentiation of *Smarca1* mutant cells is associated with defective** 263 **heterochromatinization**

264 Undifferentiated ES cells have an open chromatin structure permissive to differentiation  
265 stimuli [3]. Upon differentiation stimuli, appropriate genomic regions are  
266 heterochromatinized, and a chromatin structure specific to each cell type is established [3, 36].  
267 Abnormal protein composition of the esBAF complex and ectopic distribution of repressor  
268 proteins in undifferentiated *Smarca1<sup>m/m</sup>* ES cells suggest that the reorganization of chromatin  
269 structure upon differentiation stimuli may be impaired in *Smarca1<sup>m/m</sup>* ES cells. Therefore, we  
270 investigated the phenotypes of *Smarca1<sup>m/m</sup>* ES cells during differentiation, with a particular  
271 focus on changes in chromatin structure.

272 *WT*, *Smarca1<sup>m/m</sup>*, and *Smarca1<sup>r/r</sup>* ES cells were cultured in hanging drops for 3 days  
273 to form embryoid bodies, and microscopic images were taken for measuring the surface area.  
274 Although *WT* and *Smarca1<sup>r/r</sup>* cells developed equally, the surface area of the *Smarca1<sup>m/m</sup>*  
275 embryoid bodies was smaller than that of *WT* and *Smarca1<sup>r/r</sup>* (Fig. 5A, B), indicating a delay



276 in the proliferation of mutant cells. To investigate differentiation potential of the *Smarce1<sup>m/m</sup>*  
277 cells, embryoid bodies were transferred onto gelatin-coated plates, cultured for an additional  
278 7 days, and stained for mesodermal ( $\alpha$ -smooth muscle actin) (Fig. 5C, D) [51] and  
279 ectodermal ( $\beta$ -III tubulin) (Fig. 5E, F) [52] markers. *WT* and *Smarce1<sup>r/r</sup>* cells succeeded in  
280 differentiating into  $\alpha$ -smooth muscle actin-positive cells, and the differentiated cells were  
281 square-shaped (Fig. 5D), which is a typical morphology observed in normal differentiation,  
282 and appeared throughout the colonies. In contrast,  $\alpha$ -smooth muscle actin-positive cells were  
283 observed in the peripheral area of the *Smarce1<sup>m/m</sup>* colonies, and they were elongated and  
284 rectangular in shape (Fig. 5D). Consistent with the impaired differentiation, more Nanog-  
285 positive undifferentiated cells were observed at the center of the *Smarce1<sup>m/m</sup>* colonies than of  
286 *WT* and *Smarce1<sup>r/r</sup>* (Fig. 5C). These results indicate the defective differentiation of  
287 *Smarce1<sup>m/m</sup>* into mesodermal lineages and the persistence of undifferentiated cells. Regarding  
288 the differentiation into ectodermal lineages,  $\beta$ -III tubulin-positive cells were observed at the  
289 periphery of the colonies in *WT* and *Smarce1<sup>r/r</sup>*, whereas  $\beta$ -III tubulin-positive cells were  
290 found within almost the entire region of the colonies in *Smarce1<sup>m/m</sup>* (Fig. 5E, F).  
291 Characteristically, neurite-like structures were prominent in *Smarce1<sup>m/m</sup>* colonies and  
292 surrounded Nanog-positive cells (Fig. 5E, F), which was not observed in *WT* and *Smarce1<sup>r/r</sup>*  
293 cells. A recent study showed enhanced neuronal differentiation in human ARID1A mutant ES  
294 cells [53]. The abundant neurite-like structures observed in *Smarce1<sup>m/m</sup>* cells may have been  
295 caused by a reduced amount of Arid1a in BAF complex (Fig. 3, 4). Taken together, these  
296 results indicate that differentiation into  $\alpha$ -smooth muscle actin-positive cells is impaired in  
297 *Smarce1<sup>m/m</sup>* cells, but the outgrowth of neurites is enhanced in *Smarce1<sup>m/m</sup>* cells.

298           Next, we investigated heterochromatin formation during ES cell differentiation.  
299 Upon the stimulation of differentiation, centromeric heterochromatin foci identified by  
300 DAPI-staining increase in number, become smaller, and form discrete structures [54]. These



301 foci show constitutive heterochromatin as evidenced by immunostaining with H3K9me3 [36]  
302 and H4K20me3 [55] (Fig. 6A, B). We compared the morphology of these foci in *WT*,  
303 *Smarce1<sup>m/m</sup>*, and *Smarce1<sup>r/r</sup>* cells. *WT* and *Smarce1<sup>r/r</sup>* cells formed discrete and round foci  
304 (Fig. 6C). In contrast, the foci of *Smarce1<sup>m/m</sup>* cells showed a distorted shape (Fig. 6C). To  
305 quantitatively assess the shape of the DAPI-staining foci, we determined the circularity of  
306 these foci (Fig. 6D). The circularity of the foci in *Smarce1<sup>m/m</sup>* cells was lower compared to  
307 that in *WT* and *Smarce1<sup>r/r</sup>* cells, suggesting the impaired formation of constitutive  
308 heterochromatin.

309 To further confirm the impaired formation of heterochromatin in differentiated cells,  
310 we conducted a biochemical analysis (Fig. 6E). Histone H3 and the repressor proteins Kap1,  
311 Ezh2, and HDAC1 were extracted from the nuclei of differentiated cells at various salt  
312 concentrations. A greater quantity of histone H3 was extracted from *Smarce1<sup>m/m</sup>* cells than  
313 from *WT* and *Smarce1<sup>r/r</sup>*, suggesting loose chromatin structure in *Smarce1<sup>m/m</sup>* cells (Fig. 6E).  
314 Consistent with the morphological abnormality of the constitutive heterochromatin foci (Fig.  
315 6A–D), Kap1 was more readily extracted from *Smarce1<sup>m/m</sup>* cells than *WT* and *Smarce1<sup>r/r</sup>* cells  
316 (Fig. 6E). As observed in undifferentiated ES cells (Fig. 2B), the amount of Kap1 extracted  
317 from the nuclei decreased with increasing salt concentration in the extraction buffer (Fig. 6E).  
318 Ezh2, an integral component of PRC2 that regulates facultative heterochromatin, and  
319 HDAC1, which is associated with both constitutive and facultative heterochromatins, were  
320 also more readily extracted from *Smarce1<sup>m/m</sup>* cells than *WT* and *Smarce1<sup>r/r</sup>* cells (Fig. 6E),  
321 suggesting that heterochromatin formation was broadly impaired.

322 Based on these observations, we speculated that weak binding of histones and  
323 repressor proteins to chromatin was responsible for impaired heterochromatin formation in  
324 *Smarce1<sup>m/m</sup>* cells (Fig. 7).

325

326

## 327 **Discussion**

328

329 The current study showed that disruption of *Smarce1* decreases nucleosome stability in  
330 mouse ES cells and impairs heterochromatin formation during differentiation (Fig. 7).

331 *Smarce1* contains an HMG domain that has been shown to interact with DNA [18]. Other

332 components of the esBAF complex, such as *Arid1a*, *Smarcb1*, *Smarca4*, and *Dpf2*, also

333 contain DNA- [28, 56-62] or histone binding domains [62-66]. The genomic distribution of

334 the BAF complex is thought to be determined by the overall effect of these BAF complex

335 components. Since the genomic distribution of the BAF complex seemed altered in the

336 absence of *Smarce1* as determined by the sucrose gradient sedimentation assay (Fig. 4A), we

337 speculate that *Smarce1* serves as a guide for placing the BAF complex in the appropriate

338 genomic regions. We hypothesize that the *Smarce1<sup>m/m</sup>*-specific BAF complex may exert

339 remodeling effects on ectopic genomic regions, slide histones along the DNA, and induce the

340 loosening of chromatin structure (Fig. 7). It has been reported that loosely structured

341 chromatin is not suitable for the nucleosome binding of Polycomb group proteins [67, 68].

342 Recent studies have also shown that ectopic recruitment of the BAF complex to chromatin to

343 which Polycomb group proteins are already bound leads to the release of Polycomb group

344 proteins [69, 70]. Therefore, we speculate that the enhanced release of Polycomb group

345 proteins from chromatin observed in *Smarce1<sup>m/m</sup>* nuclei (Fig. 4A, 6E) was caused by the

346 ectopically distributed *Smarce1<sup>m/m</sup>*-specific BAF complex.

347 Mutation of BAF complex components induces tumorigenesis [16, 26, 27, 71, 72].

348 For example, SS18, a component of the BAF complex, is reported to fuse to SSX Family

349 Member 2 (SSX) by chromosomal translocation and causes synovial sarcoma. The mutant

350 BAF complex containing this SS18-SSX fusion protein evicts PRC2 from *PAX3* and *SOX2*

351 loci, decreases H3K27me3 levels, and increases the expression of these genes [73]. A  
352 mutation of SMARCE1 has been reported to cause meningiomas [29-31]. Given the  
353 similarities to synovial sarcoma formation, the ectopic distribution of the BAF complex and  
354 the eviction of PRC2 observed in *Smarce1<sup>m/m</sup>* in the current study (Fig. 4A, 6E) may be  
355 responsible for meningioma formation.

356         The HMG domain of mouse Smarce1 shares homology with the HMG box of yeast  
357 NHP6A and NHP6B (Supplementary Fig. 1) [18]. NHP6A and NHP6B physically and  
358 genetically interact with the yeast RSC chromatin remodeling complex that is closely related  
359 to the mammalian BAF complex [17, 18]. In addition, the synthetic lethality of double  
360 mutations of the yeast catalytic subunit of the RSC complex and NHP6A/B indicates the  
361 genetic interaction between these factors [74]. Furthermore, it has been reported that the  
362 association of histone to chromatin was loosened in yeast NHP6A mutant cells [42, 43],  
363 which resembled our finding in *Smarce1<sup>m/m</sup>* cells. A yeast ortholog protein of mouse Smarce1  
364 has not been reported thus far. Similarities between yeast NHP6A and mouse Smarce1  
365 suggest that NHP6A may be the functional yeast counterpart of mouse Smarce1.

366         We observed a reduced association of Arid1a to the BAF complex in *Smarce1<sup>m/m</sup>* (Fig.  
367 3, 4). Interestingly, a reduction of Smarce1 in the BAF complex was reported in Arid1a  
368 mutant cells [58]. These observations suggest a strong interaction between Smarce1 and  
369 Arid1a. A recent study shows that the prior presence of Smarce1 in the core of the BAF  
370 complex is required for the efficient recruitment of Arid1a to form the canonical BAF  
371 complex [75]. The impaired association of Arid1a with the BAF complex observed in  
372 *Smarce1<sup>m/m</sup>* in the current study supports this concept. As mentioned above, both Smarce1  
373 and Arid1a possess a DNA-binding domain [18, 56-58, 76]. The combined loss of the two  
374 DNA-binding domains in *Smarce1<sup>m/m</sup>* may exacerbate the misregulation of the BAF complex  
375 and contribute to various phenotypes such as the formation of meningioma in humans.

376 Accumulation of histone acetylation was detected in the transcriptional regulatory  
377 regions of the pluripotent factors Nanog, Oct3/4, and Sox2 (Fig. 1E–G). In contrast to these  
378 regions, enrichment of histone acetylation at the loci of the retroelements IAP and LINE1  
379 was minimal, if detected at all, in *Smarce1<sup>m/m</sup>* (Fig. 1H–K) even though the repressor protein  
380 Kap1, which has been reported to repress these retroelements [77], readily dissociated from  
381 chromatin in the salt extraction assay (Fig. 2B). These results suggest that although Kap1 was  
382 easily extracted from *Smarce1<sup>m/m</sup>* nuclei, an additional, unidentified silencing mechanism  
383 exists for IAP and LINE1.

384 After the differentiation of ES cells, morphologically more mature neuronal cells  
385 were observed in *Smarce1<sup>m/m</sup>* compared with *WT* and *Smarce1<sup>r/r</sup>* (Fig. 5E, F). As described  
386 above, we observed a reduction of Arid1a from the BAF complex of *Smarce1<sup>m/m</sup>* cells (Fig. 3,  
387 4). A previous report showed enhanced neuronal differentiation of ARID1A knockout human  
388 ES cells due to an impaired interaction between ARID1A and REST, a repressor of neuronal  
389 differentiation [53]. Furthermore, human SMARCE1 has been reported to interact with REST  
390 and is required for REST-mediated repression of neuronal genes [78]. Based on these reports,  
391 we speculate that the function of Rest was impaired in *Smarce1<sup>m/m</sup>* cells because of the  
392 reduction of Arid1a and complete loss of Smarce1 in the BAF complex, thus leading to the  
393 enhanced neuronal differentiation (Fig. 5E, F). Both SMARCE1 and ARID1A are causative  
394 genes for Coffin-Siris syndrome [32], a multiple congenital anomaly syndrome. The impaired  
395 proliferation and abnormal differentiation of *Smarce1<sup>m/m</sup>* ES cells observed in the present  
396 study (Fig. 5) may be associated with some of the developmental disorders of Coffin-Siris  
397 syndrome.

398 Our observations in Smarce1 mutant cells revealed not only the role of Smarce1 for  
399 maintaining the BAF complex integrity but also the functions of the BAF complex itself in  
400 the formation of a suitable chromatin environment for transcriptional regulation in

401 undifferentiated and differentiated cells. Further studies using mutant cells of other  
402 components of the BAF complex will help to elucidate new functions of each component in  
403 the maintenance of the BAF complex integrity and chromatin structure formation.

404

405

## 406 **Methods**

407

### 408 **Construction of the gene trap vector and insertion site in the *Smarce1* gene**

409 A *Smarce1*-heterozygous mouse ES cell clone (*Smarce1<sup>m</sup>*) was obtained using the piggyBac  
410 transposon-based gene trap vector containing the same gene trap unit we used previously [34].

411 The piggyBac gene trap vector was generated as follows. First, a 0.82-kb BglIII-ApaI

412 fragment of pT2F2GFP [34] containing the FRT-flanked GFP gene was inserted into the

413 BglIII-ApaI site of pPB-MCS-P5 [79], resulting in pPB-F2GFP. Next, a 4.8-kb XhoI-PmlI

414 fragment of the Tol2 gene trap vector pT2F2-SAhygpA-N22 [34] was cloned into the XhoI-

415 PmlI site of the pPB-F2GFP located between the two inverted terminal repeats of the

416 piggyBac transposon, resulting in pPB-SAhygA-NP22. Gene trapping was conducted as

417 described previously [34] and the ES cell clone containing the vector insertion at the first

418 intron of the *Smarce1* gene was identified. The flanking genomic sequence of the vector

419 insertion site is 5'-TTAATCGCCCCGAGACTGTTTTCTTCC-3'.

420

### 421 **Cell culture**

422 *Smarce1* homozygous mutant ES cells (*Smarce1<sup>m/m</sup>*) were obtained by doxycycline-induced  
423 interchromosomal recombination as described previously [34]. Revertant ES cells

424 (*Smarce1<sup>+/+</sup>*) were obtained by excising the gene trap unit using Flp-mediated recombination

425 as described previously [34]. Embryoid bodies (EBs) were formed in hanging drops

426 containing 1,000 cells in 20  $\mu$ l media in the absence of leukemia inhibitory factor (LIF) on  
427 the lid of a culture dish and cultured for 3 days. EBs were cultured for a further 7 days on  
428 gelatin-treated coverslips. For the salt extraction assay, differentiation was induced by  
429 culturing ES cells ( $4.0 \times 10^5$  cells) on a low attachment cell culture dish (Greiner,  
430 CELLSTAR, Cell-Repellent Surface, 628979) to form EBs in the absence of LIF for 3 days.  
431 For further induction of differentiation, EBs were cultured on a gelatin-treated dish for  
432 another 7 days. After transferring EBs to the gelatin-treated coverslips or culture dishes, the  
433 differentiation medium was changed every 2 days.

434

#### 435 **Preparation of total cell extract**

436 Cells were trypsinized and washed with PBS. The cell pellet was solubilized with 8 M urea  
437 containing 0.1 M  $\text{NaH}_2\text{PO}_4$ , 10 mM Tris-HCl (pH 8.0), cOmplete<sup>TM</sup> EDTA-free protease  
438 inhibitor cocktail (Roche, 11873580001), and 0.1 mM phenylmethylsulfonyl fluoride (PMSF).  
439 The amount of protein was measured by the Bradford method (Bio-rad, 500-0001) using  
440 BSA as a standard. An equal amount (15  $\mu$ g) of each protein was subjected to immunoblot  
441 analysis as described below.

442

#### 443 **Nuclei preparation**

444 Undifferentiated and differentiated ES cell nuclei were prepared as described elsewhere with  
445 some modifications [80]. Cells were washed with PBS and treated with trypsin for  
446 dissociation. Trypsin treatment was terminated by adding 10% calf serum-containing medium.  
447 Cells were harvested by centrifugation at  $300 \times g$  for 5 min at room temperature and washed  
448 with PBS. Cells were collected again as described above, resuspended, and washed with ice-  
449 cold nuclei isolation buffer (NIB) containing 10 mM Tris-HCl (pH 7.5), 60 mM KCl, 15 mM  
450 NaCl, 1.5 mM  $\text{MgCl}_2$ , 1 mM  $\text{CaCl}_2$ , 0.25 M sucrose, 10% (v/v) glycerol, 10 mM sodium

451 butyrate, 1 mM dithiothreitol (DTT), 0.1 mM PMSF, and cOmplete™ EDTA-free protease  
452 inhibitor cocktail. Cells were collected by centrifugation at  $300 \times g$  for 5 min at 4°C and re-  
453 suspended in NIB. An equal volume of NIB containing 0.2% (v/v) NP40 buffer was then  
454 added to cell suspensions to bring the final concentration of NP40 to 0.1% (v/v). Cells were  
455 incubated on ice for 10 min and centrifuged at  $300 \times g$  for 5 min at 4°C. Supernatants  
456 containing cytoplasmic proteins were discarded. Pelleted nuclei were resuspended in NIB and  
457 centrifuged again at  $300 \times g$  for 5 min at 4°C. Finally, nuclei were resuspended in NIB.

458

#### 459 **Salt extraction assay**

460 Nuclei were collected as described above, and a small amount of nuclei solution was taken  
461 into saturated 5 M NaCl, 8 M Urea buffer to measure the DNA concentration by UV  
462 absorbance at 260 nm (20 OD<sub>260</sub> units corresponded to 1 mg/ml DNA) [81]. The DNA  
463 concentration of the nuclei solution was adjusted to 1.5 mg/ml DNA with NIB. An equal  
464 number of nuclei in NIB was divided into four tubes and extracted with an equal volume of  
465 nuclei extraction buffer (NEB) containing 10 mM Tris-HCl (pH 7.5), 10 mM EDTA, 0.25 M  
466 sucrose, 10% (v/v) glycerol, 10 mM sodium butyrate, 1 mM DTT, 0.1 mM PMSF,  
467 cOmplete™ EDTA-free protease inhibitor cocktail, and different concentrations of NaCl (75,  
468 225, 525, or 825 mM NaCl). The resulting salt (KCl with NaCl) concentration of each tube  
469 was 75, 150, 300, or 450 mM, respectively. After overnight incubation on ice, nuclei were  
470 subjected to centrifugation at  $20,000 \times g$  for 15 min at 4°C. The supernatant fraction was  
471 collected, and the nuclear pellet was dissolved in 8M urea buffer containing 0.1 M NaH<sub>2</sub>PO<sub>4</sub>,  
472 10 mM Tris-HCl (pH 8.0), 0.1 mM PMSF, and cOmplete™ EDTA-free protease inhibitor  
473 cocktail. Equal samples in terms of initial nuclei number of each fraction were subjected to  
474 SDS-PAGE and then analyzed by immunoblot analysis as described below.

475

476 **MNase sensitivity assay**

477 An equal number of nuclei in NIB was divided into five tubes and was pre-incubated at 30°C  
478 for 10 min. The nuclei were treated with 20, 40, 80, 120, or 160 units/mg DNA of MNase at  
479 30°C for 10 min. The reaction was terminated by adding EDTA to a final concentration of 5  
480 mM. The MNase-treated DNA samples were treated with 20 µg/ml RNase at 37°C for 1 h  
481 and then 40 µg/ml proteinase K at 56°C overnight. On the following day, DNA samples were  
482 further extracted twice with 25:24:1 phenol-chloroform-isoamyl alcohol and then extracted  
483 once with chloroform-isoamyl alcohol. The extracted DNA samples were precipitated with  
484 ethanol and analyzed by 1.5% agarose gel electrophoresis in 1× TAE buffer. The DNA was  
485 visualized with ethidium bromide using a UV trans-illuminator.

486

487 **Purification of Smarca4-associated proteins**

488 Isolated nuclei in NIB were pre-incubated at 30°C for 10 min and subjected to MNase (20  
489 units/mg DNA) treatment at 30°C for 10 min. After MNase treatment, NEB225 or NEB525  
490 containing 225 mM NaCl or 525 mM NaCl was added to the nuclei solution and incubated  
491 overnight on ice. The resulting salt (KCl with NaCl) concentration of the nuclei solution was  
492 150 mM or 300 mM, respectively. The nuclear extract was separated by centrifugation at  
493 12,800 × g at 4°C for 10 min. An equal volume of NEB150 or NEB300 containing 150 mM  
494 NaCl or 300 mM NaCl with 0.2% (v/v) NP40 was added to the nuclear extract to bring the  
495 final NP40 concentration to 0.1% (IP buffer). Antibodies against mouse Smarca4 (5 µg,  
496 Abcam 110641) were added to the nuclear extract and then incubated overnight at 4°C with  
497 rotation. As a negative control, an equal amount of normal rabbit IgG (MBL, PM035) was  
498 added to the nuclear extract. The next day, Dynabeads protein G (Thermo Fisher Scientific,  
499 10003D) pre-equilibrated with IP buffer were added to the nuclear extract and incubated at  
500 4°C for 4 h with rotation. Proteins that did not bind to the Smarca4 antibodies were separated



501 by placing the Smarca4 associated proteins-Dynabeads complexes on a magnet. The  
502 complexes were washed three times with IP buffer at 4°C with rotation for 10 min. Smarca4-  
503 associated proteins were collected by placing the complexes on a magnet and eluted with  
504 Laemmli SDS-PAGE sample buffer [82]. The eluted samples were subjected to SDS-PAGE  
505 and immunoblot analysis as described below.

506

### 507 **Sucrose gradient sedimentation**

508 Isolated nuclei were treated with MNase (20 units/mg DNA) and extracted with NEB75 or  
509 NEB525 on ice overnight. The resulting salt concentration in each extract was 75 and 300  
510 mM, respectively. The next day, the extracts were subjected to centrifugation at  $12,800 \times g$   
511 for 10 min at 4°C. The supernatants were further overlaid onto 10–40% (w/v) sucrose gradient  
512 buffer containing NEB75 or NEB300 and centrifuged at 50,000 rpm for 3 h at 4°C using a  
513 TLS-55 rotor (Beckman). After centrifugation, equal volumes of each fraction were collected  
514 from the top of the centrifugation tube. The fractionated samples were mixed with Laemmli  
515 SDS-PAGE sample buffer and subjected to SDS-PAGE and immunoblot analysis as  
516 described below.

517

### 518 **Immunoblot analysis**

519 Protein samples dissolved in Laemmli buffer were separated on SDS-PAGE gel and  
520 transferred to Immobilon-P PVDF membrane (Millipore, IPVH00010). Transferred protein  
521 samples were detected using following primary antibodies: anti-Smarca4 (1:2000; Abcam,  
522 110641), anti-Arid1a (1:2000; Cell Signaling Technology, 12354), anti-Arid1b (1:2000; Cell  
523 Signaling Technology, 92964), anti-Arid3b (1:2000; Bethyl Laboratory Inc., A302-565A),  
524 anti-Smarcc1 (1:2000; Cell Signaling Technology, 11956), anti-Smarcc2 (1:2000; Cell  
525 Signaling Technology, 12760), anti-Smarce1 (1:2000; Cell Signaling Technology, 33360),

526 anti-Brd9 (1:2000; Active Motif, 61537), anti-Ezh2 (1:2000; Cell Signaling Technology,  
527 5246), anti-Suz12 (1:2000; Cell Signaling Technology, 3737), anti-HDAC1 (1:2000;  
528 Millipore, 06-720), anti-Kap1 (1:5000; Active Motif, 61173), anti-LaminB1 (1:400; Santa  
529 Cruz, Sc-20682), anti- $\beta$  actin (1:4000; Sigma, A5441), and rat anti-Histone H3 serum  
530 (1:8000; provided by H. Kimura). Membrane-bound primary antibodies were detected using  
531 horse radish peroxidase conjugated anti-rabbit IgG (Cytiva, NA934), anti-mouse IgG (Cytiva,  
532 NA931), and anti-rat IgG (Bethyl, A110-305P). Immunoreactive signals were detected using  
533 Chemi-Lumi One L (Nacalai Tesque, 07880), Chemi-Lumi One Ultra (Nacalai Tesque,  
534 11644), or ECL prime Western Blotting Detection Reagent (Cytiva, RPN2232).

535

### 536 **Immunofluorescence**

537 EBs were seeded on 0.1% (w/v) gelatin-coated coverslips. Cells were fixed with 4%  
538 paraformaldehyde, 100 mM HEPES-HCl (pH 7.4) buffer for 20 min at room temperature and  
539 were washed twice with PBS. After fixation, cells were permeabilized with 0.5% (v/v) Triton  
540 X-100 in PBS for 20 min at room temperature and were washed with PBS. Cells were further  
541 blocked with Blocking One-P (Nacalai Tesque, 05999-84) for 20 min at room temperature  
542 and then incubated overnight at 4°C with the following primary antibodies in antibody  
543 dilution buffer (PBS containing 1/10  $\times$  Blocking One-P) as indicated: anti-H3K9me3  
544 (1:1,000; 2F3, provided by H. Kimura), anti-H4K20me3 (1:1,000; 27F10, provided by H.  
545 Kimura), anti- $\beta$ -III tubulin (1:125; R&D Systems, MAB1195), anti- $\alpha$  smooth muscle actin  
546 (1:250; Sigma-Aldrich, A5228), and anti-Nanog (1:250; ReproCell, RCAB004P-F). After 6  
547 washing steps with PBST (PBS with 0.1% (v/v) Tween-20) for 5 min each, cells were  
548 incubated with the following fluorescence-conjugated secondary antibodies in antibody  
549 dilution buffer as indicated: Goat anti-mouse IgG Highly cross-adsorbed secondary antibody,  
550 Alexa Fluor 488 (1:1,000; Thermo Fisher Scientific, A-11029) and Goat anti-rabbit IgG

551 Highly cross-adsorbed secondary antibody, Alexa Fluor 594 (1:1,000; Thermo Fisher  
552 Scientific, A-11012). Cells were washed 6 times with PBST for 5 min each, and were  
553 counterstained with 300 nM of 4',6'-diamidino-2-phenylindole (DAPI). Cells were placed on  
554 coverslips and were washed with PBS and Milli-Q water and then were mounted on glass  
555 slides with ProLong Gold mounting medium (Thermo Fisher Scientific, P36934). Cells were  
556 analyzed with a Nikon C2 confocal microscopy system (Nikon).

557

### 558 **Quantitative RT-PCR**

559 Total RNA was extracted with RNeasy Plus Mini Kits (Qiagen, 74134) and reverse-  
560 transcribed with SuperScript IV (Thermo Fisher Scientific, 18090010) using random primers  
561 (Promega, C1181). Expression levels of mRNAs encoding Oct3/4, Nanog, and  $\beta$ -actin were  
562 analyzed by real-time PCR on a LightCycler (Roche Diagnostics) using the LightCycler  
563 FastStart DNA Master SYBR Green I kit (Roche Diagnostics, 03003230001). The  
564 amplification condition for Oct3/4 was 10 min at 95°C for one cycle, followed by 40 cycles  
565 of 10 s at 95°C, 5 s at 60°C, and 10 s at 72°C. The conditions for Nanog and  $\beta$ -actin were  
566 similar except that the extension step was 20 s at 72°C for Nanog and the annealing step was  
567 5 s at 55°C for  $\beta$ -actin. Primer sequences were as follows: Oct3/4, forward: 5'-  
568 CCTGGAATCGGACCAGGCTCAGAGGTATTG-3', reverse: 5'-  
569 ATTGTTGTCGGCTTCCTCCACCCACTTCTC-3'; Nanog, forward: 5'-  
570 CCACAGTTTGCCTAGTTCTGAGGAAGCATC -3', reverse: 5'-  
571 TACTCCACTGGTGCTGAGCCCTTCTGAATC-3';  $\beta$ -actin, forward: 5'-  
572 CAGGGTGTGATGGTGGGAATGGGTCAGAAG-3', reverse: 5'-  
573 TACGTACATGGCTGGGGTGTGTAAGGTCTC-3'. The quantity of each transcript was  
574 measured from a standard curve, and the amounts of Oct3/4, Nanog transcript were  
575 normalized to  $\beta$ -actin transcript levels.

576

## 577 **Chromatin immunoprecipitation (ChIP) assay**

578 The ChIP assay was carried out as described previously with some modifications[83, 84].

579 Briefly, cells were fixed by adding methanol-free 16% formaldehyde to the cell culture

580 medium to a final concentration of 1% with gentle shaking at 25°C for 10 min. After fixation

581 of cells, 2.5 M glycine solution was added to the medium to a final concentration of 0.15 M

582 and incubated at 25°C for 5 min. Cells were washed twice and suspended in PBS and then

583 were collected by scrapping into tubes. Cells were further collected by centrifugation at  $300 \times$

584 g at 4°C for 5 min. The collected cells were snap-frozen in liquid nitrogen and were stored in

585 a -80°C deep-freezer until use. Before use, cells were defrosted on ice for 10 min. To prepare

586 the nuclear extract, lysis buffer 1 containing 50 mM HEPES-KOH (pH 7.5), 140 mM NaCl, 1

587 mM EDTA, 0.25% (v/v) Triton X-100, 0.5% (v/v) NP40, 10% (v/v) glycerol, 10 mM

588 Sodium-Butyrate, 0.1 mM PMSF, and cOmplete™ EDTA-free protease inhibitor cocktail

589 was added to the defrosted cells and incubated on ice for 10 min. Cells were then collected by

590 centrifugation at  $800 \times$  g at 4°C for 5 min. Cell pellets were resuspended in lysis buffer 2

591 containing 50 mM HEPES-KOH (pH 7.5), 200 mM NaCl, 1 mM EDTA, 10 mM sodium

592 butyrate, 0.1 mM PMSF and cOmplete™ EDTA-free protease inhibitor cocktail and

593 incubated on ice for 10 min. Cells were collected again by centrifugation as described above.

594 Finally, cells were extracted with lysis buffer 3 containing 50 mM HEPES-KOH (pH 7.5),

595 140 mM NaCl, 1 mM EDTA, 0.1% (w/v) sodium deoxycholate, 1% (w/v) SDS, 1% (v/v)

596 Triton X-100, 10 mM sodium butyrate, 0.1 mM PMSF, and cOmplete™ EDTA-free protease

597 inhibitor cocktail and were incubated on ice for 30 min. A four-times volume of dilution

598 buffer containing 50 mM HEPES-KOH (pH 7.5), 140 mM NaCl, 1 mM EDTA, 0.1% (w/v)

599 sodium deoxycholate, 1% (v/v) Triton X-100, 10 mM sodium butyrate, 0.1 mM PMSF, and

600 cOmplete™ EDTA-free protease inhibitor cocktail was added to the nuclear extract to bring

601 the final concentration of SDS to 0.2% (w/v). To prepare the nuclear extract, DNA was  
602 sonicated using Bioruptor (Diagenode) on high power under the following condition: 15  
603 cycles of 30 s of on and 30 s of off, cooling samples on ice every 5 cycles. After the  
604 sonication step, the nuclear extract was collected by centrifugation at  $20,000 \times g$  for 10 min  
605 at 4°C. DNA concentration was estimated by UV absorbance at 260 nm. Nuclear extracts  
606 containing an equal amount of DNA were prepared in tubes, and then an equal volume of  
607 dilution buffer was added to bring the final SDS concentration to 0.1% (w/v). For  
608 immunoprecipitation, 5  $\mu\text{g}$  of anti-Histone H3K9me3 (2F3) and anti-H3K9ac (1qE5)  
609 antibodies (provided by H. Kimura) [84] and an equal amount of normal mouse IgG (Santa  
610 Cruz, sc-2025) were added to the nuclear extract and incubated overnight at 4°C with gentle  
611 rotation. The next day, pre-equilibrated Dynabeads M-280 sheep anti-mouse IgG (Thermo  
612 Fisher Scientific, 11201D) was added to the reaction mixture and further incubated for 4 h at  
613 4°C with gentle rotation. Antibody-bound proteins were collected with a magnet and washed  
614 for 10 min each at 4°C with gentle rotation in wash buffer as described below. The bound  
615 proteins were washed with low salt wash buffer containing 50 mM HEPES-KOH (pH 7.5),  
616 140 mM NaCl, 1 mM EDTA, 0.1% (w/v) sodium deoxycholate, 1% (v/v) Triton X-100, 0.1%  
617 (w/v) SDS, 10 mM sodium butyrate, 0.1 mM PMSF, and cOmplete™ EDTA-free protease  
618 inhibitor cocktail; high salt wash buffer containing 10 mM Tris-Cl (pH 8.0), 500 mM NaCl, 1  
619 mM EDTA, 0.1% (w/v) sodium deoxycholate, 1% (v/v) Triton X-100, 0.1% (w/v) SDS, 10  
620 mM sodium butyrate, 0.1 mM PMSF, and cOmplete™ EDTA-free protease inhibitor  
621 cocktail; LiCl wash buffer containing 10 mM Tris-Cl (pH 8.0), 250 mM LiCl, 1 mM EDTA,  
622 0.1% (w/v) sodium deoxycholate, 1% (v/v) Triton X-100, 0.1% (w/v) SDS, 10 mM sodium  
623 butyrate, 0.1 mM PMSF, and cOmplete™ EDTA-free protease inhibitor cocktail; and TE  
624 wash buffer containing 10 mM Tris-Cl (pH 8.0), 1 mM EDTA, 10 mM sodium butyrate, 0.1  
625 mM PMSF, and cOmplete™ EDTA-free protease inhibitor cocktail. After a final wash with

626 TE buffer, antibody-bound protein complexes were reverse cross-linked with elution buffer  
627 containing 10 mM Tris-Cl, pH 8.0, 300 mM NaCl, 5 mM EDTA, and 0.5% (w/v) SDS by  
628 heating at 65°C overnight. Reverse cross-linked DNA was further treated with RNase A and  
629 Proteinase K and extracted using phenol-chloroform-isoamyl alcohol and chloroform-  
630 isoamyl alcohol as described above. Finally, the extracted DNA was precipitated with ethanol  
631 and dissolved with 10 mM Tris-Cl (pH 8.0) buffer and subjected to real-time PCR analysis as  
632 follows. A serial dilution of input DNA and antibody-bound DNA were prepared from three  
633 independent ChIP experiments and analyzed two times using a StepOne Plus real-time PCR  
634 system (Thermo Fisher Scientific). PCR cycling conditions are described below. For Oct3/4  
635 detection, 2 min at 50°C, 2 min at 95°C, and 50 cycles of 15 s at 95°C, 15 s at 53°C, and 1  
636 min at 72°C. For Nanog and Sox2 detection, 2 min at 50°C, 2 min at 95°C and 40 cycles of 15  
637 s at 95°C, 15 s at 58°C, and 1 min at 72°C. For the U3 region of IAP detection, 2 min at 50°C,  
638 2 min at 95°C, and 40 cycles of 15 s at 95°C, 15 s at 60°C, and 1 min at 72°C. For the 5' UTR  
639 region of IAP detection, 2 min at 50°C, 2 min at 95°C, and 40 cycles of 15 s at 95°C, 15 s at  
640 62°C, and 1 min at 72°C. For Line L1 ORF2 detection, 2 min at 50°C, 2 min at 95°C, and 40  
641 cycles of 15 s at 95°C, 15 s at 58°C, and 1 min at 72°C. For L1MdF detection, 2 min at 50°C,  
642 2 min at 95°C, and 40 cycles of 15 s at 95°C, 15 s at 60°C, and 1 min at 72°C. Primer  
643 sequences were as follows: Oct3/4, forward: 5'-ATCCGAGCAACTGGTTTGTG-3', reverse:  
644 5'-AAACTGAGGCGAGCGCTATC-3'; Nanog, forward: 5'-  
645 GGGTAGGGTAGGAGGCTTGA-3', reverse: 5'-CGGCTCAAGGCGATAGATT-3'; Sox2,  
646 forward: 5'-CCTAGGAAAAGGCTGGGAAC-3', reverse: 5'-  
647 GTGGTGTGCCATTGTTTCTG-3'; U3 region of IAP, forward: 5'-  
648 CGAGGGTGGTTCTCTACTCCAT-3', reverse: 5'-GACGTGTCCTCCCTGATTGG-3'; 5'  
649 UTR region of IAP, forward: 5'-CGGGTCGCGGTAATAAAGGT-3', reverse: 5'-  
650 ACTCTCGTTCCCCAGCTGAA-3'; Line L1 ORF2, forward: 5'-

651 TTTGGGACACAATGAAAGCA-3', reverse: 5'-CTGCCGTCTACTCCTCTTGG-3';

652 L1MdF, forward: 5'-GCATCTCTGGGGTGAGCTAG-3', reverse: 5'-

653 AAAAGGGTGCTGCCTCAGAA-3'.

654

### 655 **Image analysis**

656 Captured images of embryoid bodies and DAPI foci were binarized using the Fiji-Image J  
657 software and Photoshop CS5.1. The surface area of embryoid bodies and circularity of DAPI  
658 foci were further analyzed using the Fiji-Image J software. Circularity was calculated by  
659  $4\pi(\text{area}/\text{perimeter}^2)$ . This value varies between 0 and 1. A value of 1 indicates a perfect  
660 circle.

661

### 662 **Statistical analysis**

663 Statistical analyses were performed using the Pairwise t-test with Bonferroni correction.  
664 Differences were considered significant at  $p$ -values  $< 0.05$ .

665

666

### 667 **Acknowledgments**

668 We thank Dr. K. Ura for assisting sucrose gradient sedimentation assay. This work was  
669 supported by MEXT KAKENHI Grant Numbers JP18K14625 (K.K.), JP18K19275 (K.H.),  
670 and JSPS KAKENHI Grant Number JP20H03174 (K.H.). This work was also supported in  
671 part by Nara Medical University Grant-in-Aid for Collaborative Research Projects (K.H.) and  
672 a research grant from the Naito Foundation (K.H.) and the Takeda Science Foundation (K.H.).

673

674

### 675 **Author contributions**

676 K.K. and K.H. conceived and designed the project. J.Y. and K.H. generated *Smarce1* mutant  
677 ES cells. J.Y. conducted expression analysis of pluripotency genes. K.K. conducted all other  
678 experiments. H.K. provided histone antibodies and assisted interpretation of the data. K.K.  
679 and K.H. wrote the manuscript with input from the other authors.

680

681

## 682 **Figure legends**

683

### 684 **Figure 1. *Smarce1* knockout locally induces H3K9-acetylation in mouse ES cells.**

685 (A) Structure of the *Smarce1* alleles of wild-type (*WT*), homozygous mutant (*Smarce1<sup>m/m</sup>*),  
686 and revertant (*Smarce1<sup>r/r</sup>*) ES cells used in this study. E, exon; PB, *PiggyBac* transposon; SA,  
687 splice acceptor; *hyg*, hygromycin-resistance gene; pA, polyadenylation signal; Pr, *Pgk1*  
688 promoter; N, neomycin-resistance gene; P, puromycin-resistance gene.

689 (B) Protein expression analysis of *Smarce1*. Equal amounts of total proteins (15  $\mu$ g) from *WT*,  
690 *Smarce1<sup>m/m</sup>*, and *Smarce1<sup>r/r</sup>* ES cells were analyzed by immunoblot analysis using the  
691 indicated antibodies. *WT*, wild-type; m/m, *Smarce1<sup>m/m</sup>*; r/r, *Smarce1<sup>r/r</sup>*.

692 (C) Brightfield images of *WT*, homozygous mutant *Smarce1<sup>m/m</sup>*, and revertant *Smarce1<sup>r/r</sup>* ES  
693 cells. Scale bar, 200  $\mu$ m.

694 (D) mRNA expression of pluripotency genes in *Smarce1<sup>m/m</sup>* and *Smarce1<sup>r/r</sup>* ES cells relative  
695 to *WT* ES cells. Expression levels of *Oct3/4* and *Nanog* were quantified by quantitative RT-  
696 PCR and normalized to  $\beta$ -*actin* expression level. Expression levels of *WT* ES cells were set to  
697 1. \*\* indicates *p*-values of < 0.01.

698 (E)–(K) Chromatin immunoprecipitation assay. Nuclear extracts prepared from *WT*,  
699 *Smarce1<sup>m/m</sup>*, and *Smarce1<sup>r/r</sup>* ES cells were incubated with control mouse IgG, anti-H3K9ac,  
700 and anti-H3K9me3 antibodies. Immunoprecipitated DNA from specific genomic regions of



701 *Oct3/4* (E), *Nanog* (F), *Sox2* (G), *L1 ORF2* (H), *L1MdF* (I), *IAP 5' UTR* (J), and *IAP U3* (K)  
702 were analyzed by real-time PCR and expressed as a percentage of input DNA. \* and \*\*  
703 indicate *p*-values of < 0.05 and < 0.01, respectively.

704

705 **Figure 2. Smarce1 knockout loosens binding of histone H3 to DNA.**

706 (A) Schematic representation of the salt extraction assay. Nuclei in a solution containing  
707 equal amounts of DNA from *WT*, *Smarce1<sup>m/m</sup>*, and *Smarce1<sup>r/r</sup>* ES cells were treated with  
708 buffers of different salt concentrations (75 mM to 450 mM), separated into supernatants and  
709 pellets by centrifugation, and analyzed in (B). *WT*, wild-type; *m/m*, *Smarce1<sup>m/m</sup>*; *r/r*,  
710 *Smarce1<sup>r/r</sup>*; NIB, nuclei isolation buffer.

711 (B) Association of proteins to chromatin analyzed by immunoblot analysis using the  
712 indicated antibodies. Note that histone H3, Arid1a, and Kap1 were more easily extracted in  
713 the supernatant fraction.

714 (C) Schematic representation of the MNase sensitivity assay. Nuclei in a solution containing  
715 an equal amount of DNA were cut with indicated units of MNase.

716 (D) MNase-treated DNAs were separated on a 1.5% agarose gel and visualized by ethidium  
717 bromide staining.

718

719 **Figure 3. The interaction between Smarca4 and the components of the BAF complex is  
720 reduced in *Smarce1<sup>m/m</sup>* ES cells.**

721 Immunoblot analysis of Smarca4-associated proteins using the indicated antibodies.  
722 Immunoprecipitation was carried out in the presence of 150 mM salt. The input represents  
723 10% of nuclear extracts.

724

725 **Figure 4. Sucrose gradient sedimentation analysis of the distribution of BAF complex**  
726 **component proteins and chromatin-associated proteins.**

727 Nuclear proteins from *WT* or *Smarce1<sup>m/m</sup>* ES cells extracted with 75 mM (A) or 300 mM (B)  
728 salt-containing buffer were subjected to 10 to 40% (w/v) sucrose gradient sedimentation  
729 analysis. Equal amounts of protein from each fraction were analyzed by immunoblot assay  
730 using the indicated antibodies. Estimated molecular weights are shown at the top. *WT*, wild-  
731 type; m/m, *Smarce1<sup>m/m</sup>*; r/r, *Smarce1<sup>r/r</sup>*.

732

733 **Figure 5. Abnormal differentiation of *Smarce1<sup>m/m</sup>* ES cells.**

734 (A) Brightfield images of embryoid bodies of *WT*, *Smarce1<sup>m/m</sup>*, and *Smarce1<sup>r/r</sup>* cells obtained  
735 by hanging drop culture (day 3). Images were taken immediately after transferring embryoid  
736 bodies onto gelatin-coated coverslips. *WT*, wild-type; m/m, *Smarce1<sup>m/m</sup>*; r/r, *Smarce1<sup>r/r</sup>*. Scale  
737 bars, 200  $\mu$ m.

738 (B) Quantification of the surface area of embryoid bodies (day 3). \*\* indicates *p*-values of <  
739 0.01.

740 (C) Immunostaining of differentiated cells with anti- $\alpha$ -smooth muscle actin antibodies on day  
741 10 of differentiation. Embryoid bodies on day 3 (shown in (A)) were cultured on gelatin-  
742 coated coverslips for 7 days. Red, green, and blue signals in the merged images represent  
743 Nanog,  $\alpha$ -smooth muscle actin, and DAPI-stained DNA, respectively. Scale bar, 100  $\mu$ m.

744 (D) Immunostaining images of  $\alpha$ -smooth muscle actin-positive cells on day 10 of  
745 differentiation. Green and blue signals in the merged images represent  $\alpha$ -smooth muscle actin  
746 and DAPI-stained DNA, respectively. Scale bar, 100  $\mu$ m.

747 (E) Immunostaining images of  $\beta$ -III-tubulin-positive cells around Nanog-positive cells on  
748 day 10 of differentiation. Red (R), green (G), and blue (B) signals in the merged images  
749 represent Nanog,  $\beta$ -III-tubulin, and DAPI-stained DNA, respectively. Scale bar, 100  $\mu$ m.

750 (F) Immunostaining images of  $\beta$ -III-tubulin-positive cells in peripheral regions of embryoid  
751 bodies on day 10 of differentiation. Green and blue signals in the merged images represent  $\beta$ -  
752 III-tubulin and DAPI-stained DNA, respectively. Scale bar, 100  $\mu$ m.

753

754 **Figure 6. Defects in heterochromatin formation during the differentiation of *Smarce1<sup>m/m</sup>***  
755 **ES cells.**

756 (A, B) Immunostaining of heterochromatin markers on day 10 of differentiation. Green and  
757 blue signals in the merged images represent H3K9me3 and DNA in (A) and H4K20me3 and  
758 DNA in (B), respectively. Scale bar, 10  $\mu$ m. (C) Nuclei images of *WT*, *Smarce1<sup>m/m</sup>*, and  
759 *Smarce1<sup>r/r</sup>* cells. DAPI foci highlighted by red squares are presented as enlarged images on  
760 the top left side. Scale bar, 10  $\mu$ m. (D) Circularity of DAPI foci in *WT*, *Smarce1<sup>m/m</sup>*, and  
761 *Smarce1<sup>r/r</sup>* cells. Circularity was measured by  $4\pi(\text{area}/\text{perimeter}^2)$ . \*\* indicates *p*-values of  
762  $< 0.01$ .

763 (E) Loosened association of proteins to chromatin by salt extraction assay. Each protein was  
764 detected by immunoblot analysis using the indicated antibodies.

765

766 **Figure 7. Hypothetical model of the induction of unstable chromatin structure in**  
767 ***Smarce1<sup>m/m</sup>* cells.**

768 Histone dissociation from chromatin was induced in undifferentiated *Smarce1<sup>m/m</sup>* ES cells by  
769 ectopic genomic localization of the *Smarce1<sup>m/m</sup>*-specific BAF complex, leading to unstable  
770 chromatin structure. During ES cell differentiation, the unstable chromatin structure might  
771 not be a suitable platform for binding of repressor proteins such as PRC2 and HDAC1.  
772 Impaired recruitment of repressor proteins to proper genomic regions might further induce  
773 abnormal heterochromatinization and differentiation.

774

775

## 776 References

- 777 1. Wolffe A: **Chromatin: structure and function**. Academic press; 1998.
- 778 2. Baldi S, Korber P, Becker PB: **Beads on a string-nucleosome array arrangements and folding**  
779 **of the chromatin fiber**. *Nat Struct Mol Biol* 2020, **27**:109-118.
- 780 3. Meshorer E, Yellajoshula D, George E, Scambler PJ, Brown DT, Misteli T: **Hyperdynamic**  
781 **plasticity of chromatin proteins in pluripotent embryonic stem cells**. *Dev Cell* 2006, **10**:105-  
782 116.
- 783 4. Chambeyron S, Bickmore WA: **Chromatin decondensation and nuclear reorganization of**  
784 **the HoxB locus upon induction of transcription**. *Genes Dev* 2004, **18**:1119-1130.
- 785 5. Lim PSL, Meshorer E: **Organization of the Pluripotent Genome**. *Cold Spring Harb Perspect*  
786 *Biol* 2020.
- 787 6. Clapier CR, Iwasa J, Cairns BR, Peterson CL: **Mechanisms of action and regulation of ATP-**  
788 **dependent chromatin-remodelling complexes**. *Nat Rev Mol Cell Biol* 2017, **18**:407-422.
- 789 7. Becker PB, Workman JL: **Nucleosome remodeling and epigenetics**. *Cold Spring Harb*  
790 *Perspect Biol* 2013, **5**.
- 791 8. Tsukiyama T: **The in vivo functions of ATP-dependent chromatin-remodelling factors**. *Nat*  
792 *Rev Mol Cell Biol* 2002, **3**:422-429.
- 793 9. Fei J, Torigoe SE, Brown CR, Khuong MT, Kassavetis GA, Boeger H, Kadonaga JT: **The**  
794 **prenucleosome, a stable conformational isomer of the nucleosome**. *Genes Dev* 2015,  
795 **29**:2563-2575.
- 796 10. Torigoe SE, Urwin DL, Ishii H, Smith DE, Kadonaga JT: **Identification of a rapidly formed**  
797 **nonnucleosomal histone-DNA intermediate that is converted into chromatin by ACF**. *Mol*  
798 *Cell* 2011, **43**:638-648.
- 799 11. Corona DFV, Längst G, Clapier CR, Bonte EJ, Ferrari S, Tamkun JW, Becker PB: **ISWI Is an ATP-**  
800 **Dependent Nucleosome Remodeling Factor**. *Molecular Cell* 1999, **3**:239-245.
- 801 12. Ito T, Bulger M, Pazin MJ, Kobayashi R, Kadonaga JT: **ACF, an ISWI-Containing and ATP-**  
802 **Utilizing Chromatin Assembly and Remodeling Factor**. *Cell* 1997, **90**:145-155.
- 803 13. Mizuguchi G, Shen X, Landry J, Wu WH, Sen S, Wu C: **ATP-driven exchange of histone H2AZ**  
804 **variant catalyzed by SWR1 chromatin remodeling complex**. *Science* 2004, **303**:343-348.
- 805 14. Boeger H, Griesenbeck J, Strattan JS, Kornberg RD: **Removal of promoter nucleosomes by**  
806 **disassembly rather than sliding in vivo**. *Mol Cell* 2004, **14**:667-673.
- 807 15. Kennison JA, Tamkun JW: **Dosage-dependent modifiers of polycomb and antennapedia**  
808 **mutations in Drosophila**. *Proc Natl Acad Sci U S A* 1988, **85**:8136-8140.
- 809 16. Kadoch C, Crabtree GR: **Mammalian SWI/SNF chromatin remodeling complexes and**  
810 **cancer: Mechanistic insights gained from human genomics**. *Science Advances* 2015,  
811 **1**:e1500447.
- 812 17. Wang W, Côté J, Xue Y, Zhou S, Khavari PA, Biggar SR, Muchardt C, Kalpana GV, Goff SP,  
813 Yaniv M, et al: **Purification and biochemical heterogeneity of the mammalian SWI-SNF**  
814 **complex**. *The EMBO Journal* 1996, **15**:5370-5382.
- 815 18. Wang W, Chi T, Xue Y, Zhou S, Kuo A, Crabtree GR: **Architectural DNA binding by a high-**  
816 **mobility-group/kinesin-like subunit in mammalian SWI/SNF-related complexes**. *Proc Natl*  
817 *Acad Sci U S A* 1998, **95**:492-498.
- 818 19. Ho L, Ronan JL, Wu J, Staahl BT, Chen L, Kuo A, Lessard J, Nesvizhskii AI, Ranish J, Crabtree  
819 GR: **An embryonic stem cell chromatin remodeling complex, esBAF, is essential for**  
820 **embryonic stem cell self-renewal and pluripotency**. *Proc Natl Acad Sci U S A* 2009,  
821 **106**:5181-5186.

- 822 20. Ho L, Jothi R, Ronan JL, Cui K, Zhao K, Crabtree GR: **An embryonic stem cell chromatin**  
823 **remodeling complex, esBAF, is an essential component of the core pluripotency**  
824 **transcriptional network.** *Proc Natl Acad Sci U S A* 2009, **106**:5187-5191.
- 825 21. Ho PJ, Lloyd SM, Bao X: **Unwinding chromatin at the right places: how BAF is targeted to**  
826 **specific genomic locations during development.** *Development* 2019, **146**.
- 827 22. Hainer SJ, Boskovic A, McCannell KN, Rando OJ, Fazio TG: **Profiling of Pluripotency Factors**  
828 **in Single Cells and Early Embryos.** *Cell* 2019, **177**:1319-1329 e1311.
- 829 23. Lessard J, Wu JI, Ranish JA, Wan M, Winslow MM, Staahl BT, Wu H, Aebersold R, Graef IA,  
830 Crabtree GR: **An essential switch in subunit composition of a chromatin remodeling**  
831 **complex during neural development.** *Neuron* 2007, **55**:201-215.
- 832 24. Bachmann C, Nguyen H, Rosenbusch J, Pham L, Rabe T, Patwa M, Sokpor G, Seong RH,  
833 Ashery-Padan R, Mansouri A, et al: **mSWI/SNF (BAF) Complexes Are Indispensable for the**  
834 **Neurogenesis and Development of Embryonic Olfactory Epithelium.** *PLoS Genet* 2016,  
835 **12**:e1006274.
- 836 25. Staahl BT, Tang J, Wu W, Sun A, Gitler AD, Yoo AS, Crabtree GR: **Kinetic analysis of npBAF to**  
837 **nBAF switching reveals exchange of SS18 with CREST and integration with neural**  
838 **developmental pathways.** *J Neurosci* 2013, **33**:10348-10361.
- 839 26. Alfert A, Moreno N, Kerl K: **The BAF complex in development and disease.** *Epigenetics*  
840 *Chromatin* 2019, **12**:19.
- 841 27. Kadoch C, Hargreaves DC, Hodges C, Elias L, Ho L, Ranish J, Crabtree GR: **Proteomic and**  
842 **bioinformatic analysis of mammalian SWI/SNF complexes identifies extensive roles in**  
843 **human malignancy.** *Nat Genet* 2013, **45**:592-601.
- 844 28. Nakayama RT, Pulice JL, Valencia AM, McBride MJ, McKenzie ZM, Gillespie MA, Ku WL, Teng  
845 M, Cui K, Williams RT, et al: **SMARCB1 is required for widespread BAF complex-mediated**  
846 **activation of enhancers and bivalent promoters.** *Nat Genet* 2017, **49**:1613-1623.
- 847 29. Smith MJ, O'Sullivan J, Bhaskar SS, Hadfield KD, Poke G, Caird J, Sharif S, Eccles D, Fitzpatrick  
848 D, Rawluk D, et al: **Loss-of-function mutations in SMARCE1 cause an inherited disorder of**  
849 **multiple spinal meningiomas.** *Nat Genet* 2013, **45**:295-298.
- 850 30. Smith MJ, Wallace AJ, Bennett C, Hasselblatt M, Elert-Dobkowska E, Evans LT, Hickey WF,  
851 van Hoff J, Bauer D, Lee A, et al: **Germline SMARCE1 mutations predispose to both spinal**  
852 **and cranial clear cell meningiomas.** *J Pathol* 2014, **234**:436-440.
- 853 31. Gerkes EH, Fock JM, den Dunnen WF, van Belzen MJ, van der Lans CA, Hoving EW, Fakkert IE,  
854 Smith MJ, Evans DG, Olderode-Berends MJ: **A heritable form of SMARCE1-related**  
855 **meningiomas with important implications for follow-up and family screening.**  
856 *Neurogenetics* 2016, **17**:83-89.
- 857 32. Santen GW, Aten E, Vulto-van Silfhout AT, Pottinger C, van Bon BW, van Minderhout IJ,  
858 Snowdowne R, van der Lans CA, Boogaard M, Linszen MM, et al: **Coffin-Siris syndrome and**  
859 **the BAF complex: genotype-phenotype study in 63 patients.** *Hum Mutat* 2013, **34**:1519-  
860 1528.
- 861 33. Papoulas O, Daubresse G, Armstrong JA, Jin J, Scott MP, Tamkun JW: **The HMG-domain**  
862 **protein BAP111 is important for the function of the BRM chromatin-remodeling complex**  
863 **in vivo.** *Proc Natl Acad Sci U S A* 2001, **98**:5728-5733.
- 864 34. Horie K, Kokubu C, Yoshida J, Akagi K, Isotani A, Oshitani A, Yusa K, Ikeda R, Huang Y, Bradley  
865 A, Takeda J: **A homozygous mutant embryonic stem cell bank applicable for phenotype-**  
866 **driven genetic screening.** *Nat Methods* 2011, **8**:1071-1077.
- 867 35. Chen T, Dent SY: **Chromatin modifiers and remodellers: regulators of cellular**  
868 **differentiation.** *Nat Rev Genet* 2014, **15**:93-106.
- 869 36. Probst AV, Dunleavy E, Almouzni G: **Epigenetic inheritance during the cell cycle.** *Nat Rev*  
870 *Mol Cell Biol* 2009, **10**:192-206.

- 871 37. Matsui T, Leung D, Miyashita H, Maksakova IA, Miyachi H, Kimura H, Tachibana M, Lorincz  
872 MC, Shinkai Y: **Proviral silencing in embryonic stem cells requires the histone**  
873 **methyltransferase ESET.** *Nature* 2010, **464**:927-931.
- 874 38. Karimi MM, Goyal P, Maksakova IA, Bilenky M, Leung D, Tang JX, Shinkai Y, Mager DL, Jones  
875 S, Hirst M, Lorincz MC: **DNA methylation and SETDB1/H3K9me3 regulate predominantly**  
876 **distinct sets of genes, retroelements, and chimeric transcripts in mESCs.** *Cell Stem Cell* 2011,  
877 **8**:676-687.
- 878 39. Sachs P, Ding D, Bergmaier P, Lamp B, Schlagheck C, Finkernagel F, Nist A, Stiewe T,  
879 Mermoud JE: **SMARCAD1 ATPase activity is required to silence endogenous retroviruses in**  
880 **embryonic stem cells.** *Nat Commun* 2019, **10**:1335.
- 881 40. Corpet F: **Multiple sequence alignment with hierarchical clustering.** *Nucleic Acids Res* 1988,  
882 **16**:10881-10890.
- 883 41. Szerlong H, Saha A, Cairns BR: **The nuclear actin-related proteins Arp7 and Arp9: a dimeric**  
884 **module that cooperates with architectural proteins for chromatin remodeling.** *EMBO J*  
885 2003, **22**:3175-3187.
- 886 42. Dowell NL, Sperling AS, Mason MJ, Johnson RC: **Chromatin-dependent binding of the *S.***  
887 ***cerevisiae* HMGB protein Nhp6A affects nucleosome dynamics and transcription.** *Genes*  
888 *Dev* 2010, **24**:2031-2042.
- 889 43. Moreira JM, Holmberg S: **Chromatin-mediated transcriptional regulation by the yeast**  
890 **architectural factors NHP6A and NHP6B.** *EMBO J* 2000, **19**:6804-6813.
- 891 44. Thoma F, Koller T, Klug A: **Involvement of histone H1 in the organization of the nucleosome**  
892 **and of the salt-dependent superstructures of chromatin.** *J Cell Biol* 1979, **83**:403-427.
- 893 45. Allan J, Cowling GJ, Harborne N, Cattini P, Craigie R, Gould H: **Regulation of the higher-order**  
894 **structure of chromatin by histones H1 and H5.** *J Cell Biol* 1981, **90**:279-288.
- 895 46. Wang X, Lee RS, Alver BH, Haswell JR, Wang S, Mieczkowski J, Drier Y, Gillespie SM, Archer  
896 TC, Wu JN, et al: **SMARCB1-mediated SWI/SNF complex function is essential for enhancer**  
897 **regulation.** *Nat Genet* 2017, **49**:289-295.
- 898 47. Wang X, Wang S, Troisi EC, Howard TP, Haswell JR, Wolf BK, Hawk WH, Ramos P, Oberlick  
899 EM, Tzvetkov EP, et al: **BRD9 defines a SWI/SNF sub-complex and constitutes a specific**  
900 **vulnerability in malignant rhabdoid tumors.** *Nat Commun* 2019, **10**:1881.
- 901 48. Michel BC, D'Avino AR, Cassel SH, Mashtalir N, McKenzie ZM, McBride MJ, Valencia AM,  
902 Zhou Q, Bocker M, Soares LMM, et al: **A non-canonical SWI/SNF complex is a synthetic**  
903 **lethal target in cancers driven by BAF complex perturbation.** *Nat Cell Biol* 2018, **20**:1410-  
904 1420.
- 905 49. Li J, Xi Y, Li W, McCarthy RL, Stratton SA, Zou W, Li W, Dent SY, Jain AK, Barton MC: **TRIM28**  
906 **interacts with EZH2 and SWI/SNF to activate genes that promote mammosphere**  
907 **formation.** *Oncogene* 2017, **36**:2991-3001.
- 908 50. Carey TS, Cao Z, Choi I, Ganguly A, Wilson CA, Paul S, Knott JG: **BRG1 Governs Nanog**  
909 **Transcription in Early Mouse Embryos and Embryonic Stem Cells via Antagonism of**  
910 **Histone H3 Lysine 9/14 Acetylation.** *Mol Cell Biol* 2015, **35**:4158-4169.
- 911 51. Hinz B, Celetta G, Tomasek JJ, Gabbiani G, Chaponnier C: **Alpha-smooth muscle actin**  
912 **expression upregulates fibroblast contractile activity.** *Mol Biol Cell* 2001, **12**:2730-2741.
- 913 52. Roskams AJI, Cai X, Ronnett GV: **Expression of neuron-specific beta-III tubulin during**  
914 **olfactory neurogenesis in the embryonic and adult rat.** *Neuroscience* 1998, **83**:191-200.
- 915 53. Liu J, Liu S, Gao H, Han L, Chu X, Sheng Y, Shou W, Wang Y, Liu Y, Wan J, Yang L: **Genome-**  
916 **wide studies reveal the essential and opposite roles of ARID1A in controlling human**  
917 **cardiogenesis and neurogenesis from pluripotent stem cells.** *Genome Biol* 2020, **21**:169.
- 918 54. Novo CL, Tang C, Ahmed K, Djuric U, Fussner E, Mullin NP, Morgan NP, Hayre J, Sienerth AR,  
919 Elderkin S, et al: **The pluripotency factor Nanog regulates pericentromeric heterochromatin**  
920 **organization in mouse embryonic stem cells.** *Genes Dev* 2016, **30**:1101-1115.



- 921 55. Jørgensen S, Schotta G, Sørensen CS: **Histone H4 lysine 20 methylation: key player in**  
922 **epigenetic regulation of genomic integrity.** *Nucleic Acids Res* 2013, **41**:2797-2806.
- 923 56. Nie Z, Xue Y, Yang D, Zhou S, Deroo BJ, Archer TK, Wang W: **A specificity and targeting**  
924 **subunit of a human SWI/SNF family-related chromatin-remodeling complex.** *Mol Cell Biol*  
925 2000, **20**:8879-8888.
- 926 57. Wilsker D, Patsialou A, Zumbun SD, Kim S, Chen Y, Dallas PB, Moran E: **The DNA-binding**  
927 **properties of the ARID-containing subunits of yeast and mammalian SWI/SNF complexes.**  
928 *Nucleic Acids Res* 2004, **32**:1345-1353.
- 929 58. Mathur R, Alver BH, San Roman AK, Wilson BG, Wang X, Agoston AT, Park PJ, Shivdasani RA,  
930 Roberts CW: **ARID1A loss impairs enhancer-mediated gene regulation and drives colon**  
931 **cancer in mice.** *Nat Genet* 2017, **49**:296-302.
- 932 59. Allen MD, Freund SM, Zinzalla G, Bycroft M: **The SWI/SNF Subunit INI1 Contains an N-**  
933 **Terminal Winged Helix DNA Binding Domain that Is a Target for Mutations in**  
934 **Schwannomatosis.** *Structure* 2015, **23**:1344-1349.
- 935 60. Han P, Li W, Lin CH, Yang J, Shang C, Nuernberg ST, Jin KK, Xu W, Lin CY, Lin CJ, et al: **A long**  
936 **noncoding RNA protects the heart from pathological hypertrophy.** *Nature* 2014, **514**:102-  
937 106.
- 938 61. Morrison EA, Sanchez JC, Ronan JL, Farrell DP, Varzavand K, Johnson JK, Gu BX, Crabtree GR,  
939 Musselman CA: **DNA binding drives the association of BRG1/hBRM bromodomains with**  
940 **nucleosomes.** *Nat Commun* 2017, **8**:16080.
- 941 62. Agalioti T, Chen G, Thanos D: **Deciphering the Transcriptional Histone Acetylation Code for**  
942 **a Human Gene.** *Cell* 2002, **111**:381-392.
- 943 63. Shen W, Xu C, Huang W, Zhang J, Carlson JE, Tu X, Wu J, Shi Y: **Solution structure of human**  
944 **Brg1 bromodomain and its specific binding to acetylated histone tails.** *Biochemistry* 2007,  
945 **46**:2100-2110.
- 946 64. Local A, Huang H, Albuquerque CP, Singh N, Lee AY, Wang W, Wang C, Hsia JE, Shiau AK, Ge  
947 K, et al: **Identification of H3K4me1-associated proteins at mammalian enhancers.** *Nat*  
948 *Genet* 2018, **50**:73-82.
- 949 65. Xiong X, Panchenko T, Yang S, Zhao S, Yan P, Zhang W, Xie W, Li Y, Zhao Y, Allis CD, Li H:  
950 **Selective recognition of histone crotonylation by double PHD fingers of MOZ and DPFF2.**  
951 *Nat Chem Biol* 2016, **12**:1111-1118.
- 952 66. Bonaldi T, Langst G, Strohner R, Becker PB, Bianchi ME: **The DNA chaperone HMGB1**  
953 **facilitates ACF/CHRAC-dependent nucleosome sliding.** *EMBO J* 2002, **21**:6865-6873.
- 954 67. Cao R, Zhang Y: **SUZ12 is required for both the histone methyltransferase activity and the**  
955 **silencing function of the EED-EZH2 complex.** *Mol Cell* 2004, **15**:57-67.
- 956 68. Martin C, Cao R, Zhang Y: **Substrate preferences of the EZH2 histone methyltransferase**  
957 **complex.** *J Biol Chem* 2006, **281**:8365-8370.
- 958 69. Kadoch C, Williams RT, Calarco JP, Miller EL, Weber CM, Braun SM, Pulice JL, Chory EJ,  
959 Crabtree GR: **Dynamics of BAF-Polycomb complex opposition on heterochromatin in**  
960 **normal and oncogenic states.** *Nat Genet* 2017, **49**:213-222.
- 961 70. Stanton BZ, Hodges C, Calarco JP, Braun SM, Ku WL, Kadoch C, Zhao K, Crabtree GR: **Smarca4**  
962 **ATPase mutations disrupt direct eviction of PRC1 from chromatin.** *Nat Genet* 2017, **49**:282-  
963 288.
- 964 71. Wilson BG, Roberts CWM: **SWI/SNF nucleosome remodellers and cancer.** *Nature Reviews*  
965 *Cancer* 2011, **11**:481-492.
- 966 72. Roberts CWM, Orkin SH: **The SWI/SNF complex — chromatin and cancer.** *Nature Reviews*  
967 *Cancer* 2004, **4**:133-142.
- 968 73. McBride MJ, Pulice JL, Beird HC, Ingram DR, D'Avino AR, Shern JF, Charville GW, Hornick JL,  
969 Nakayama RT, Garcia-Rivera EM, et al: **The SS18-SSX Fusion Oncoprotein Hijacks BAF**  
970 **Complex Targeting and Function to Drive Synovial Sarcoma.** *Cancer Cell* 2018, **33**:1128-  
971 1141 e1127.

- 972 74. Biswas D, Imbalzano AN, Eriksson P, Yu Y, Stillman DJ: **Role for Nhp6, Gcn5, and the Swi/Snf**  
973 **complex in stimulating formation of the TATA-binding protein-TFIIA-DNA complex.** *Mol*  
974 *Cell Biol* 2004, **24**:8312-8321.
- 975 75. Mashtalir N, D'Avino AR, Michel BC, Luo J, Pan J, Otto JE, Zullo HJ, McKenzie ZM, Kubiak RL,  
976 St Pierre R, et al: **Modular Organization and Assembly of SWI/SNF Family Chromatin**  
977 **Remodeling Complexes.** *Cell* 2018, **175**:1272-1288 e1220.
- 978 76. Dallas PB, Pacchione S, Wilsker D, Bowrin V, Kobayashi R, Moran E: **The human SWI-SNF**  
979 **complex protein p270 is an ARID family member with non-sequence-specific DNA binding**  
980 **activity.** *Mol Cell Biol* 2000, **20**:3137-3146.
- 981 77. Rowe HM, Jakobsson J, Mesnard D, Rougemont J, Reynard S, Aktas T, Maillard PV, Layard-  
982 Liesching H, Verp S, Marquis J, et al: **KAP1 controls endogenous retroviruses in embryonic**  
983 **stem cells.** *Nature* 2010, **463**:237-240.
- 984 78. Battaglioli E, Andres ME, Rose DW, Chenoweth JG, Rosenfeld MG, Anderson ME, Mandel G:  
985 **REST repression of neuronal genes requires components of the hSWI.SNF complex.** *J Biol*  
986 *Chem* 2002, **277**:41038-41045.
- 987 79. Yoshida J, Akagi K, Misawa R, Kokubu C, Takeda J, Horie K: **Chromatin states shape insertion**  
988 **profiles of the piggyBac, Tol2 and Sleeping Beauty transposons and murine leukemia virus.**  
989 *Sci Rep* 2017, **7**:43613.
- 990 80. Kashiwagi K, Nimura K, Ura K, Kaneda Y: **DNA methyltransferase 3b preferentially**  
991 **associates with condensed chromatin.** *Nucleic Acids Res* 2011, **39**:874-888.
- 992 81. Ura K, Kaneda Y: **Reconstitution of chromatin in vitro.** *Methods Mol Biol* 2001, **181**:309-325.
- 993 82. Laemmli UK: **Cleavage of structural proteins during the assembly of the head of**  
994 **bacteriophage T4.** *Nature* 1970, **227**:680-685.
- 995 83. Blecher-Gonen R, Barnett-Itzhaki Z, Jaitin D, Amann-Zalcenstein D, Lara-Astiaso D, Amit I:  
996 **High-throughput chromatin immunoprecipitation for genome-wide mapping of in vivo**  
997 **protein-DNA interactions and epigenomic states.** *Nat Protoc* 2013, **8**:539-554.
- 998 84. Kimura H, Hayashi-Takanaka Y, Goto Y, Takizawa N, Nozaki N: **The organization of histone**  
999 **H3 modifications as revealed by a panel of specific monoclonal antibodies.** *Cell Struct Funct*  
1000 2008, **33**:61-73.  
1001



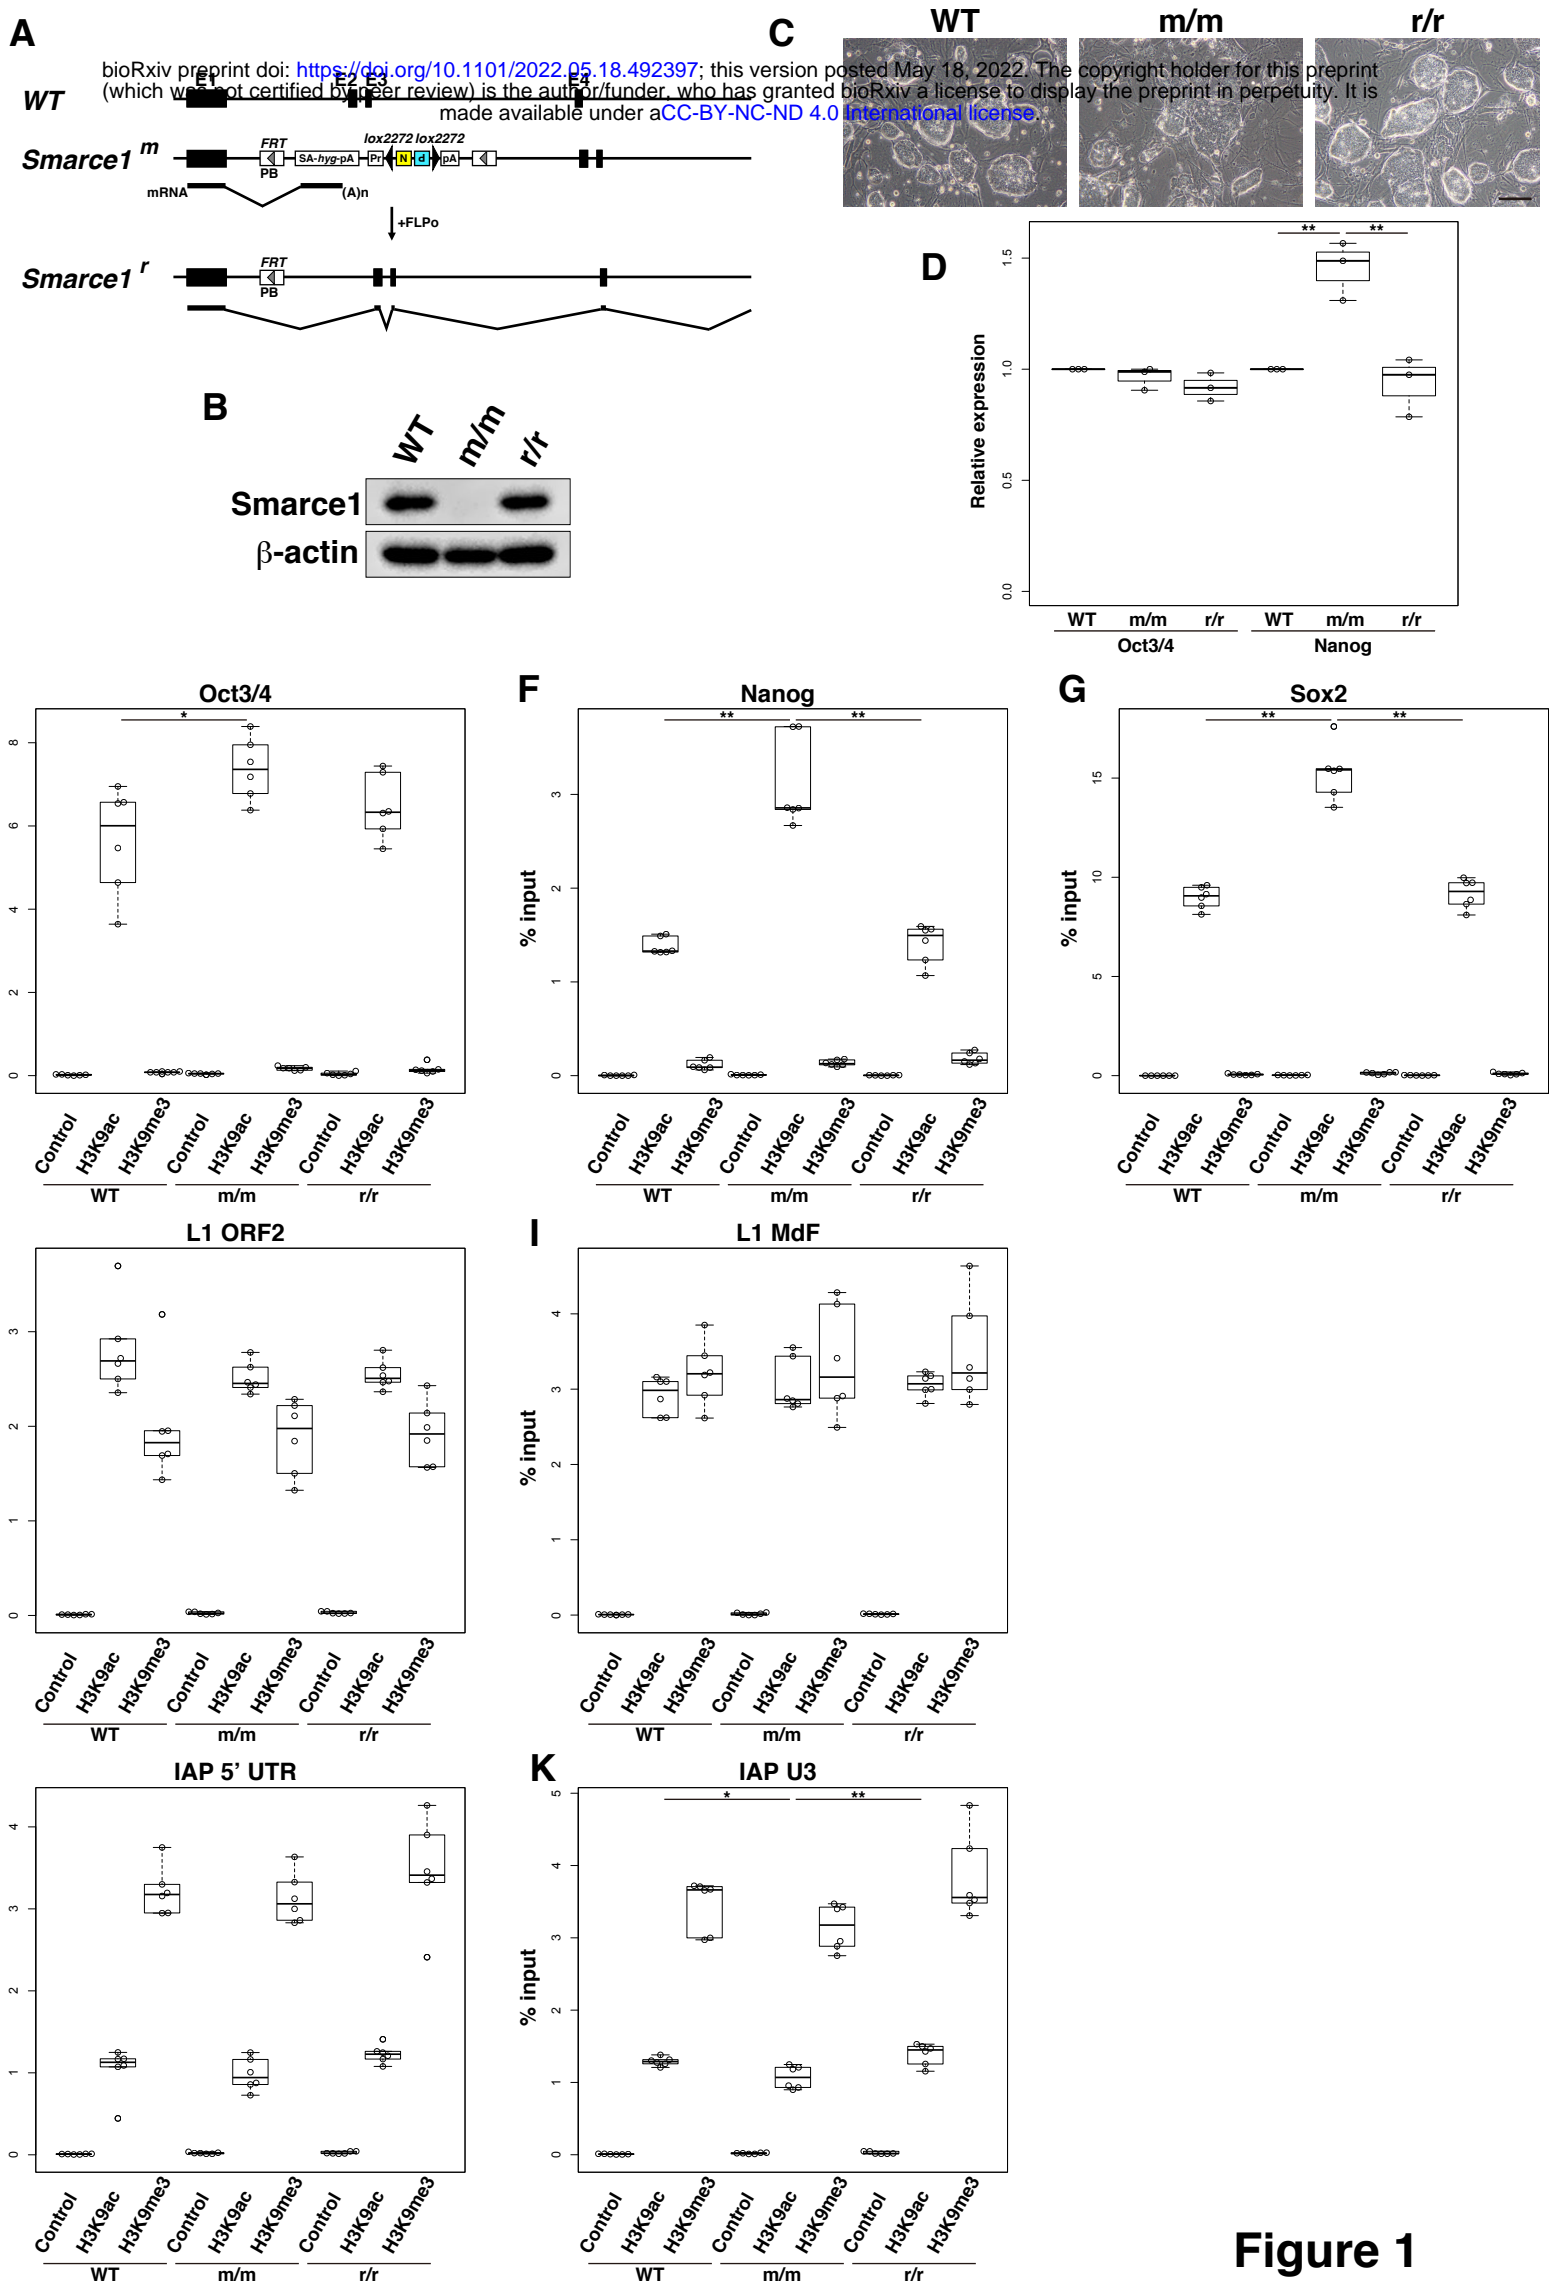

**Figure 1**

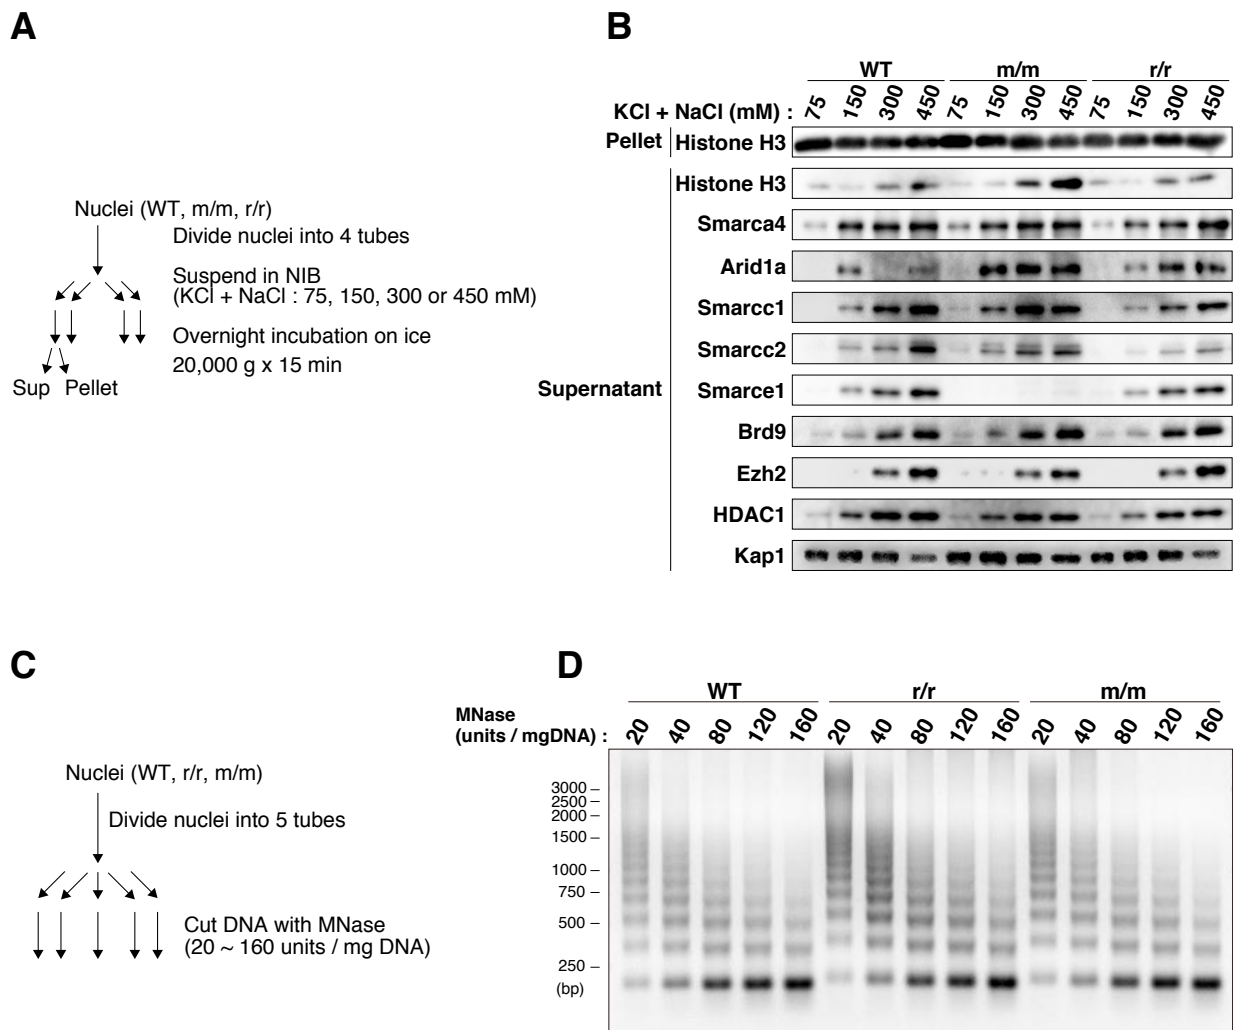

Figure 2

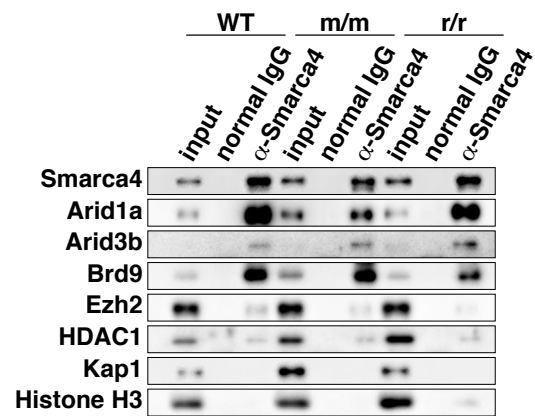

**Figure 3**

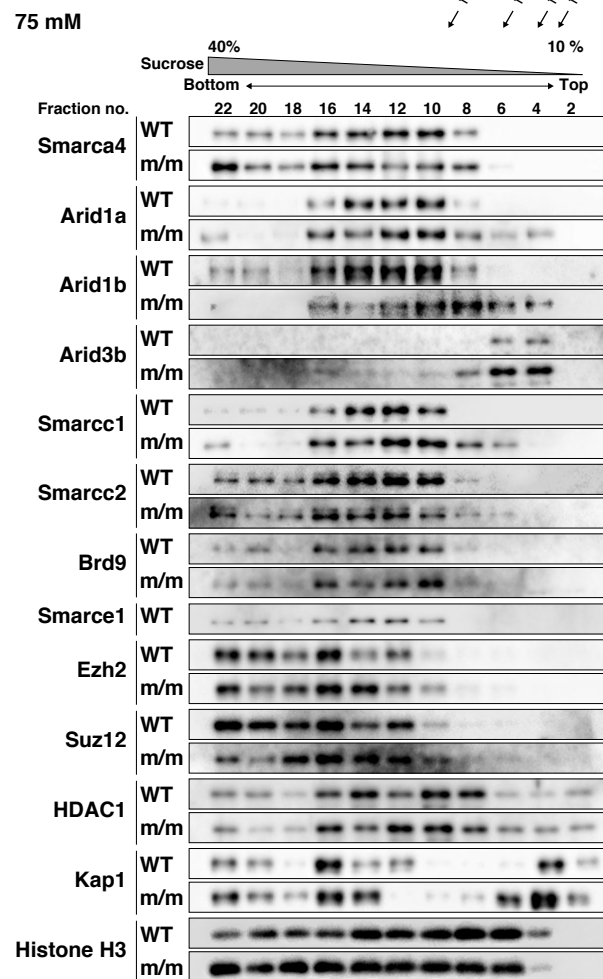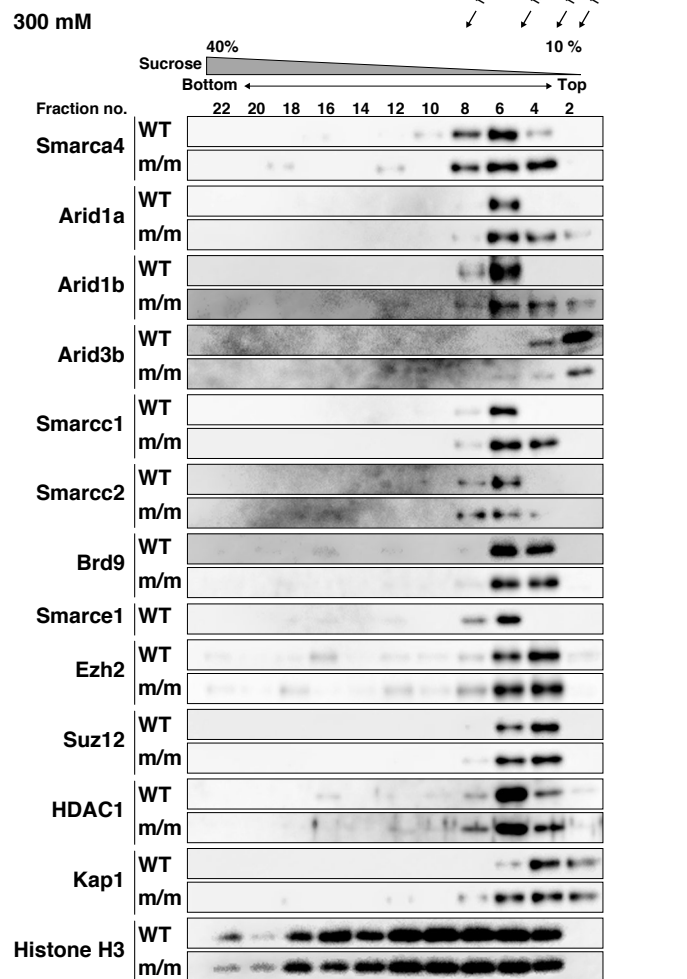

**Figure 4**

**A**

bioRxiv preprint doi: <https://doi.org/10.1101/2022.05.18.492397>; this version posted May 18, 2022. The copyright holder for this preprint (which was not certified by peer review) is the author/funder, who has granted bioRxiv a license to display the preprint in perpetuity. It is made available under aCC-BY-NC-ND 4.0 International license.

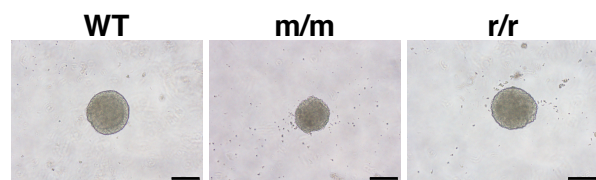**B**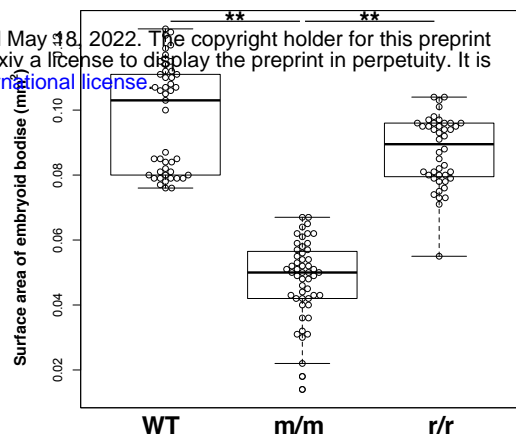**C**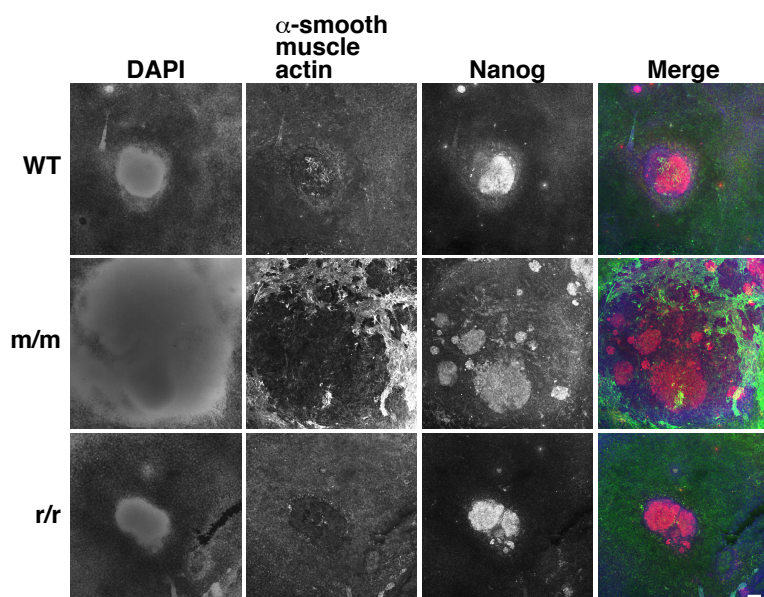**D**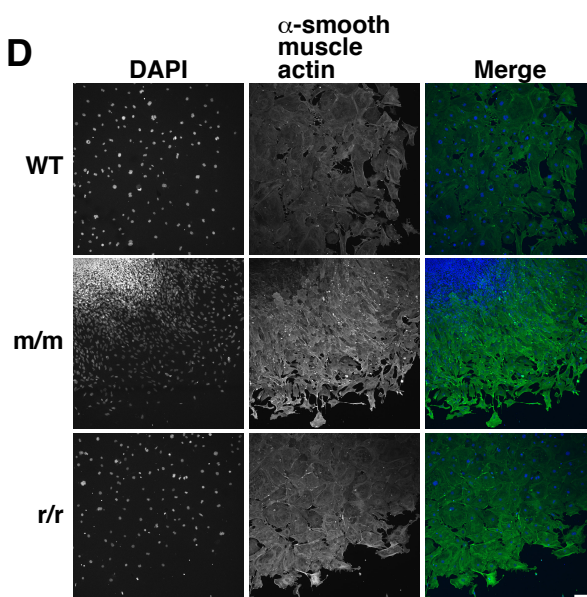**E**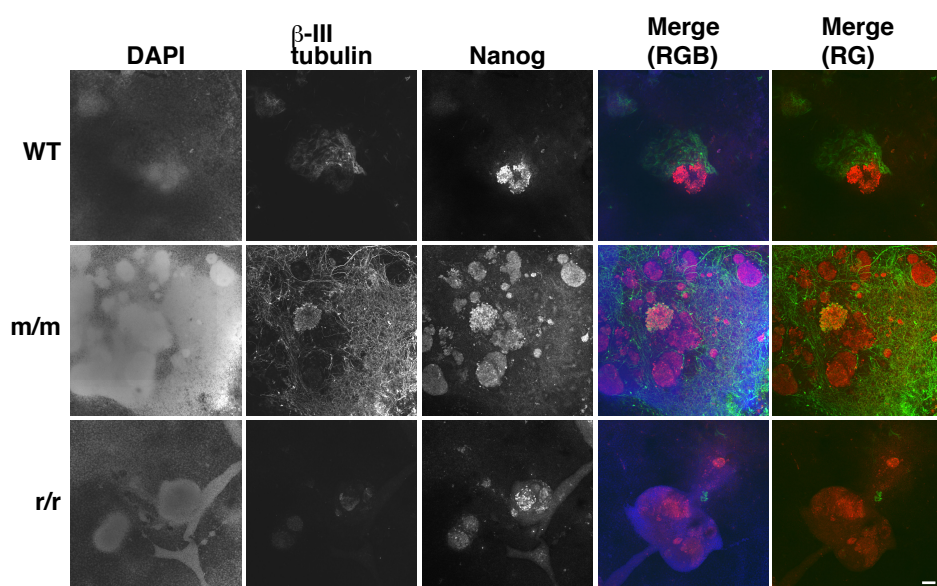**F**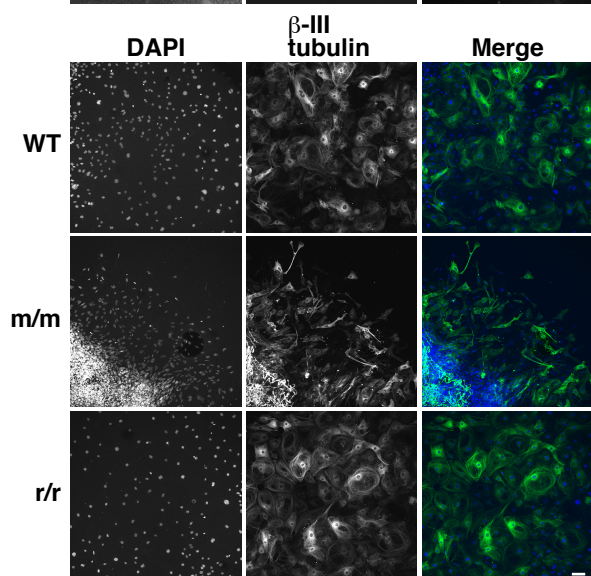**Figure 5**



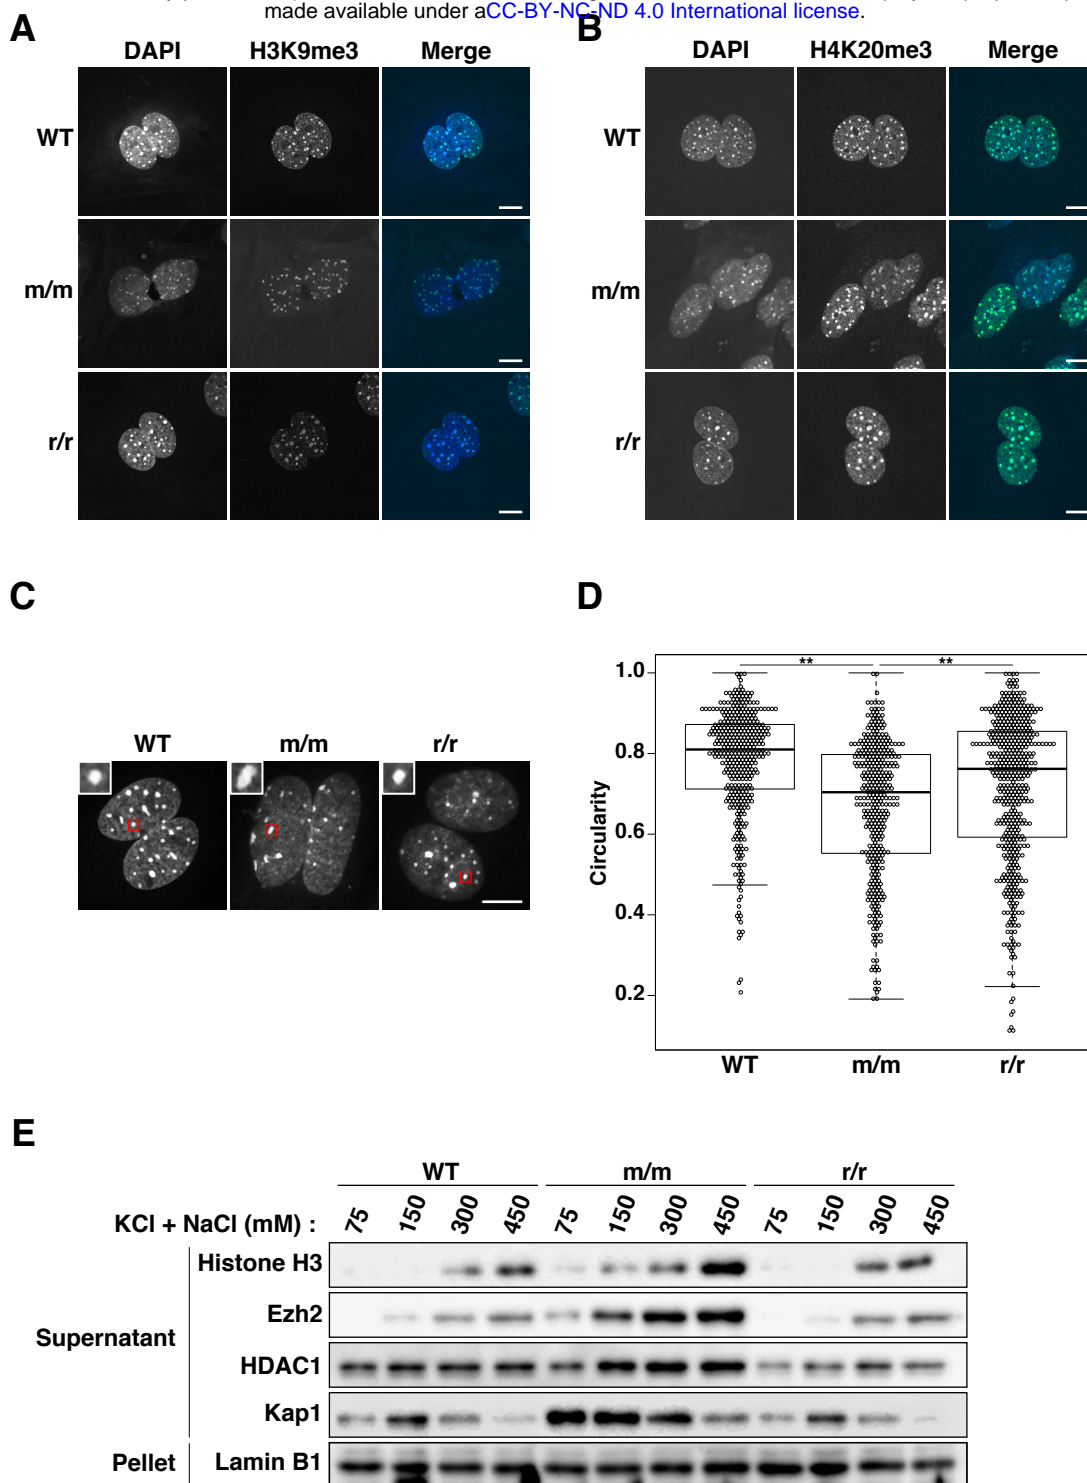

**Figure 6**

**Undifferentiated cells**

**Differentiated cells**

**WT ES cells**

**esBAF complex**

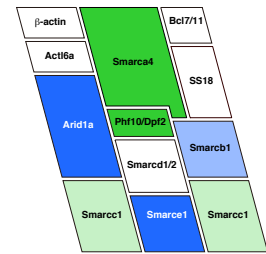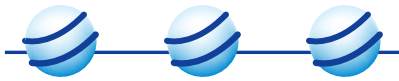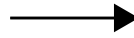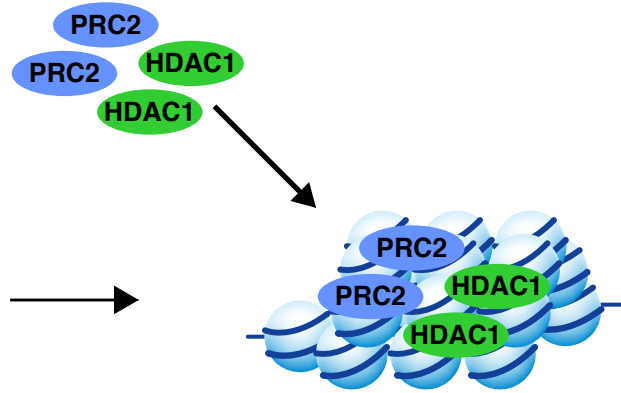

**Smarce1<sup>m/m</sup> ES cells**

**Smarce1<sup>m/m</sup>- specific BAF**

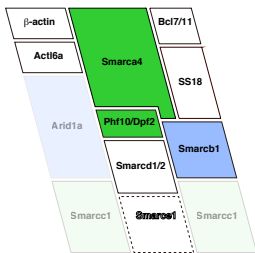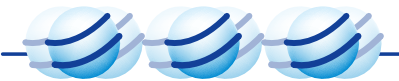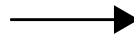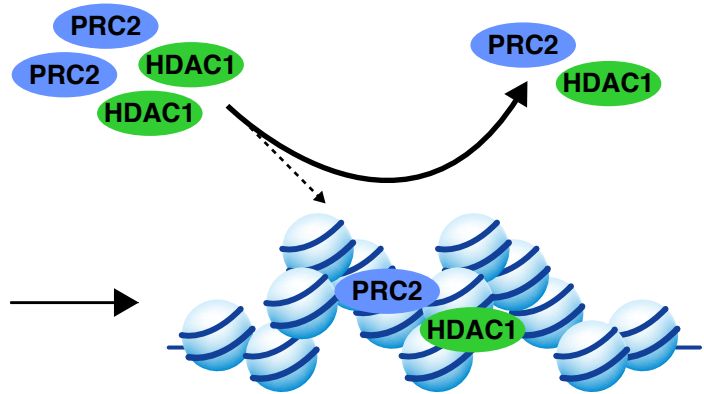

**Figure 7**
